# Supplementary material for: Short contacts of the sulphur atoms of a 1,2,3,5-dithiadiazolyl dimer with triphenylstibine: first co-crystal with an aromatic compound
Source: Royal Society of Chemistry journal article supplement (doi:10.1039/c6ce00351f), 2016-01-01
Supplement: c6ce00351f1.pdf [file c6ce00351f1.pdf]

## Short contacts of the sulphur atoms of a 1,2,3,5-dithiadiazolyl dimer with triphenylstibine: first co-crystal with an aromatic compound

René T. Boéré\*

*Department of Chemistry and Biochemistry, and the Canadian Centre for Research in Advanced Fluorine Technologies. University of Lethbridge, Lethbridge, Alberta, Canada, T1K 3M4. Fax: +403-329-2057; Tel. +403-329-2045 E-mail: boere@uleth.ca*

### Electronic Supplementary Information

| Index                                                                                                           | Page |
|-----------------------------------------------------------------------------------------------------------------|------|
| <b>Figure S1.</b> The full atom numbering scheme of the structure of <b>1</b> .                                 | S2   |
| <b>Figure S2.</b> An overlay of structures of DTDA dimers in <b>2</b> and <b>1</b> .                            | S2   |
| <b>Figure S3.</b> Two views of the layer structure in the crystal lattice of <b>1</b> .                         | S3   |
| <b>Table S1.</b> Intermolecular contacts in <b>1</b> less than ( $\Sigma r_{vdW} - 0.1 \text{ \AA}$ )           | S4   |
| <b>Figure S4.</b> End-to-side contacts of one DTDA dimer with another in the structure of <b>1</b> .            | S4   |
| <b>Figure S5.</b> Two views of the layer structure in the crystal lattice of <b>2</b> .                         | S5   |
| <b>Table S2.</b> Intermolecular contacts in <b>2</b> less than $\Sigma r_{vdW}$                                 | S6   |
| <b>Figure S6.</b> Depiction of the centrosymmetric pseudo-cuboidal in the monoclinic form of <b>3</b>           | S6   |
| <b>Table S3.</b> Summary of Natural Population Analysis in a model system for <b>2</b> .                        | S8   |
| <b>Figure S7.</b> Another view of the $C_{60} \cdot 6Ph_3Sb$ structure.                                         | S8   |
| <b>Figure S8.</b> PBEPBE/6-311+g(2df,2p) DFT calculated NPA charge distribution in $C_{60} : 6 C_6H_6$          | S9   |
| <b>Table S4.</b> Summary of Natural Population Analysis in a model system for <b>4</b>                          | S9   |
| <b>Details</b> of the Crystal Structure Refinement of <b>1</b> .                                                | S13  |
| <b>Figure S9.</b> Depiction of the two-component disorder models developed for the $CF_3$ groups in <b>1</b> .  | S13  |
| <b>Table S5.</b> Crystal structure report for <b>1</b>                                                          | S14  |
| <b>Details</b> of the Crystal Structure Refinement of <b>2</b> .                                                | S35  |
| <b>Figure S10.</b> Depiction of the two-component disorder models developed for the $CF_3$ groups in <b>2</b> . | S35  |
| <b>Table S6.</b> Crystal structure report for <b>2</b>                                                          | S36  |



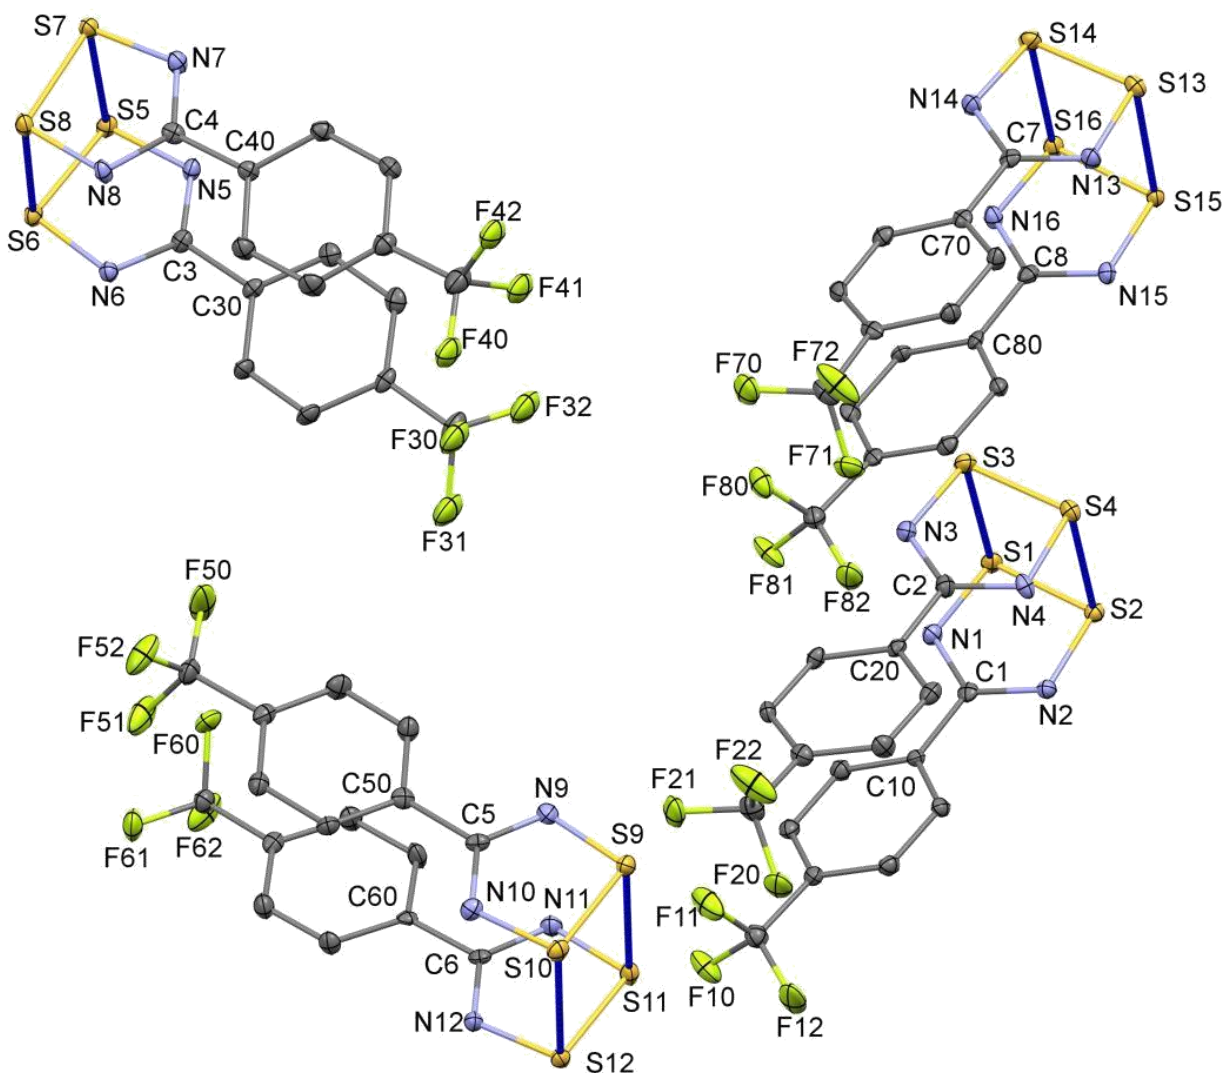

**Figure S1.** The full atom numbering scheme of the structure of **1**. The two-part disorder model for the fluorine atoms in dimer **1iii** is also shown (refined occupancy ratio 67:33).

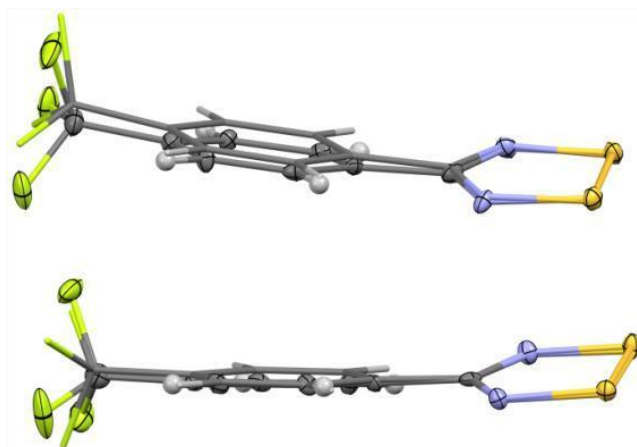

**Figure S2.** An overlay of structures of dtda dimers in **2** shown as a line diagram and one of the four independent dimers in **1**, shown as displacement ellipsoids.

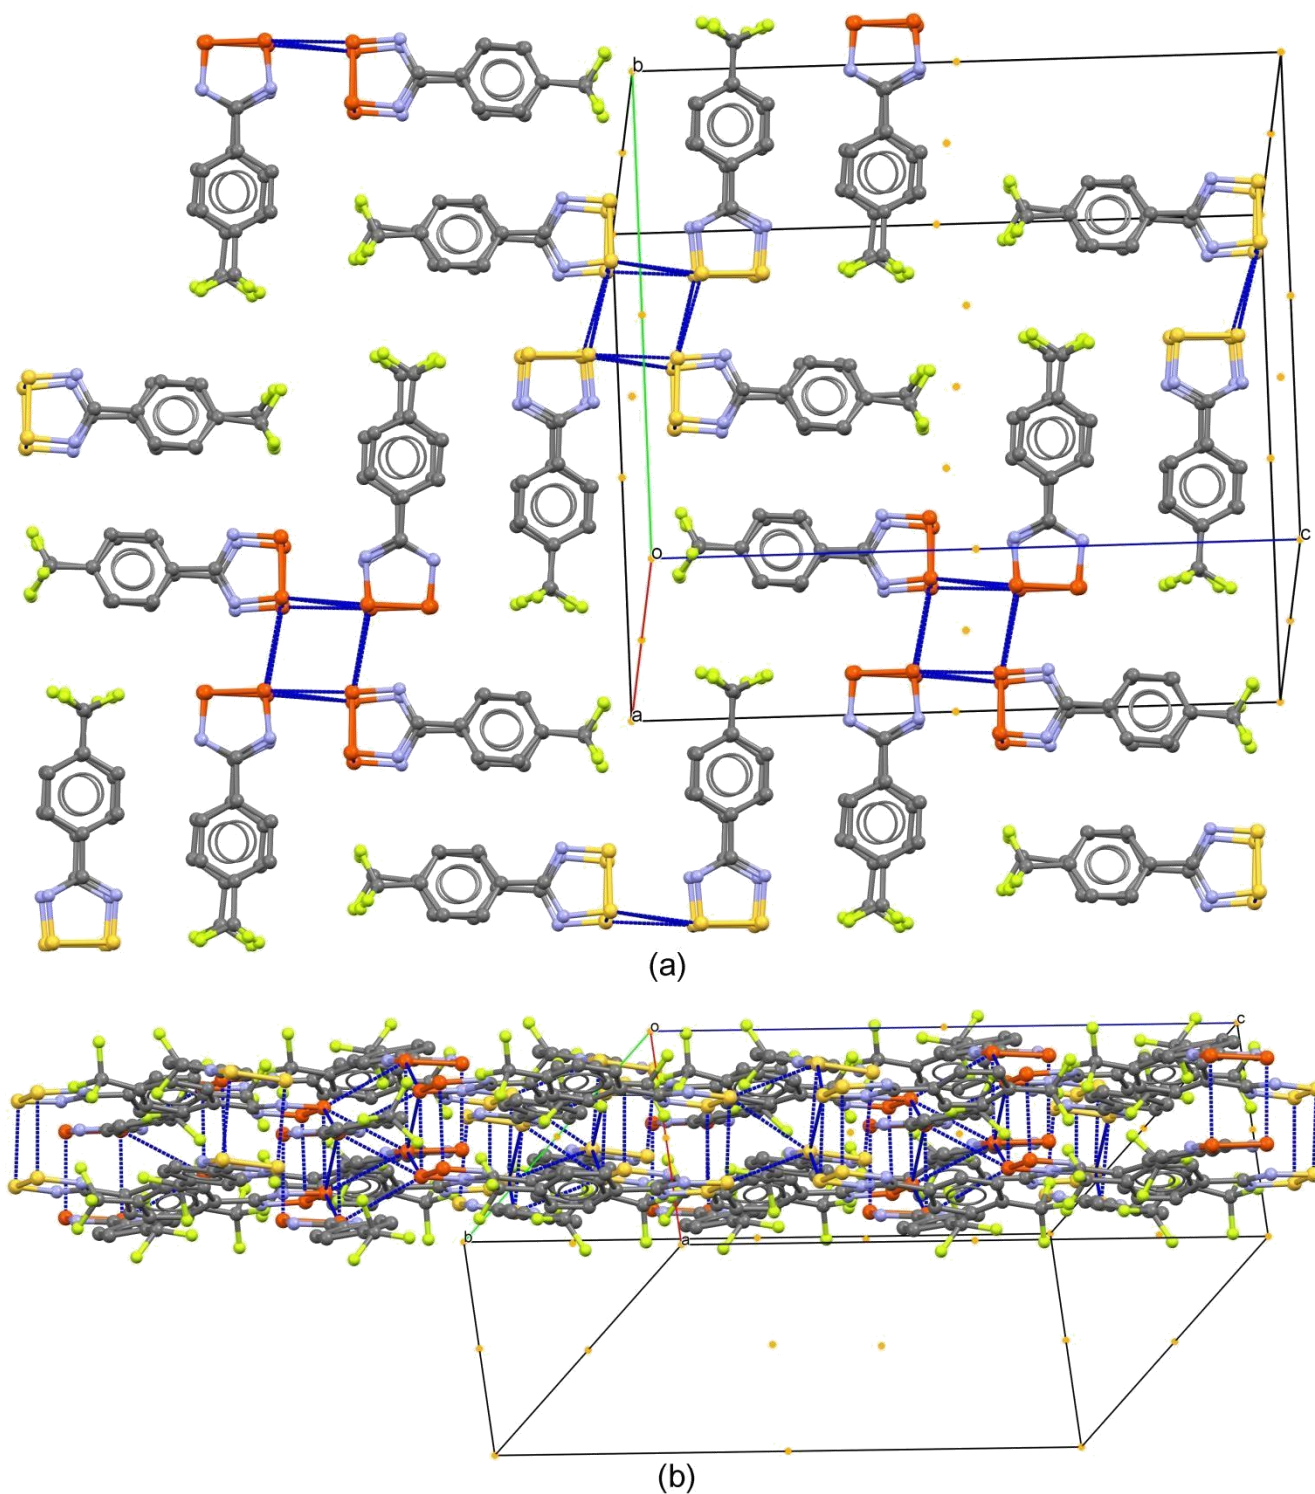

**Figure S3.** Two views of the layer structure in the crystal lattice of **1**. The layer is  $\sim 8.3$  Å thick and parallel to the (1 1 0) Miller plane. Both unique pin-wheel tetramers lie within the plane which is seen from (a) a top view and (b) a side view. The unit cell boundaries are shown as are the locations of the sites by yellow dots. The sulfur atoms are false-coloured to orange and yellow to distinguish the first and second ( $S'$  in Figure 2) pin-wheels.

**Table S1.** Intermolecular Contacts in **1** less than ( $\Sigma r_{vdW} - 0.1 \text{ \AA}$ ) (except for inter-slice distances)

| Atom1               | Atom2 | Symm. op. 1 | Symm. op. 2 | Length                        | Length < $\Sigma r_{vdW}$ |
|---------------------|-------|-------------|-------------|-------------------------------|---------------------------|
| Intra-Dimer         |       |             |             |                               |                           |
| S2                  | S4    | x,y,z       | x,y,z       | 3.031(2)                      | -0.569                    |
| S6                  | S8    | x,y,z       | -1+x,y,z    | 3.031(2)                      | -0.569                    |
| S14                 | S16   | x,y,z       | 1+x,y,z     | 3.043(2)                      | -0.557                    |
| S13                 | S15   | x,y,z       | 1+x,y,z     | 3.046(2)                      | -0.554                    |
| S1                  | S3    | x,y,z       | x,y,z       | 3.054(2)                      | -0.546                    |
| S9                  | S11   | x,y,z       | x,y,z       | 3.076(2)                      | -0.524                    |
| S10                 | S12   | x,y,z       | x,y,z       | 3.110(2)                      | -0.490                    |
| S6                  | S7    | x,y,z       | -1+x,y,z    | 3.170(2)                      | -0.430                    |
|                     |       |             |             | <i>Mean(s.u.)</i> 3.07(5)     | -0.53(5)                  |
| Dimer-to- neighbour |       |             |             |                               |                           |
| S15                 | S10   | x,y,z       | 1-x,1-y,1-z | 3.247(2)                      | -0.353                    |
| S6                  | S2    | x,y,z       | -1+x,1+y,z  | 3.259(2)                      | -0.341                    |
| S15                 | S12   | x,y,z       | -1+x,y,1+z  | 3.271(2)                      | -0.329                    |
| N15                 | S10   | x,y,z       | 1-x,1-y,1-z | 3.130(4)                      | -0.220                    |
| S7                  | S4    | -1+x,y,z    | -1+x,1+y,z  | 3.387(2)                      | -0.213                    |
| S13                 | S10   | -1+x,y,z    | -1+x,y,1+z  | 3.391(2)                      | -0.209                    |
| S7                  | S2    | -1+x,y,z    | -x,1-y,1-z  | 3.399(2)                      | -0.201                    |
| S6                  | N2    | x,y,z       | 3.156(4)    | 3.156(4)                      | -0.194                    |
| S6                  | S4    | x,y,z       | -x,1-y,1-z  | 3.419(2)                      | -0.181                    |
| S13                 | S12   | -1+x,y,z    | -1+x,y,1+z  | 3.437(2)                      | -0.163                    |
| N15                 | S9    | x,y,z       | 1-x,1-y,1-z | 3.225(4)                      | -0.125                    |
| S16                 | N12   | x,y,z       | -1+x,y,1+z  | 3.230(4)                      | -0.120                    |
| N7                  | S3    | -1+x,y,z    | -x,1-y,1-z  | 3.241(4)                      | -0.109                    |
|                     |       |             |             | <i>S-S Mean(s.u.)</i> 3.35(8) | -0.25(7)                  |
|                     |       |             |             | <i>S-N Mean(s.u.)</i> 3.23(5) | -0.19(8)                  |
| Inter-slice         |       |             |             |                               |                           |
| S14                 | S10   | x,y,z       | 1-x,1-y,1-z | 3.711(2)                      | +0.111                    |
| S3                  | S6    | x,y,z       | x,1+y,z     | 3.765(2)                      | +0.165                    |

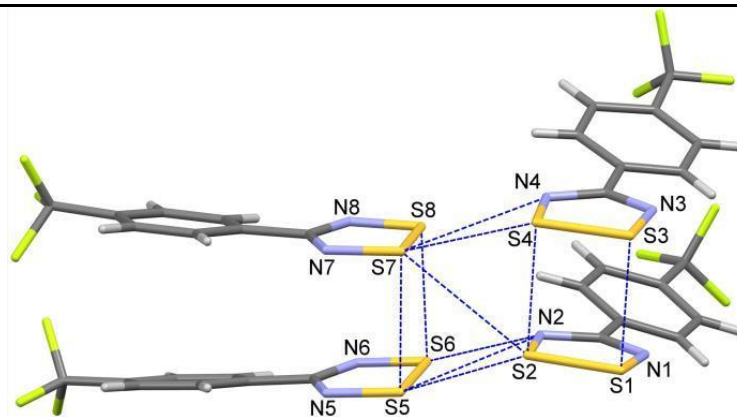**Figure S4.** Detailed view of the end-to-side contacts of one DTDA dimer with another in the same layer in the structure of **1**. This group is part of the left-hand cluster shown in Figure 2a.

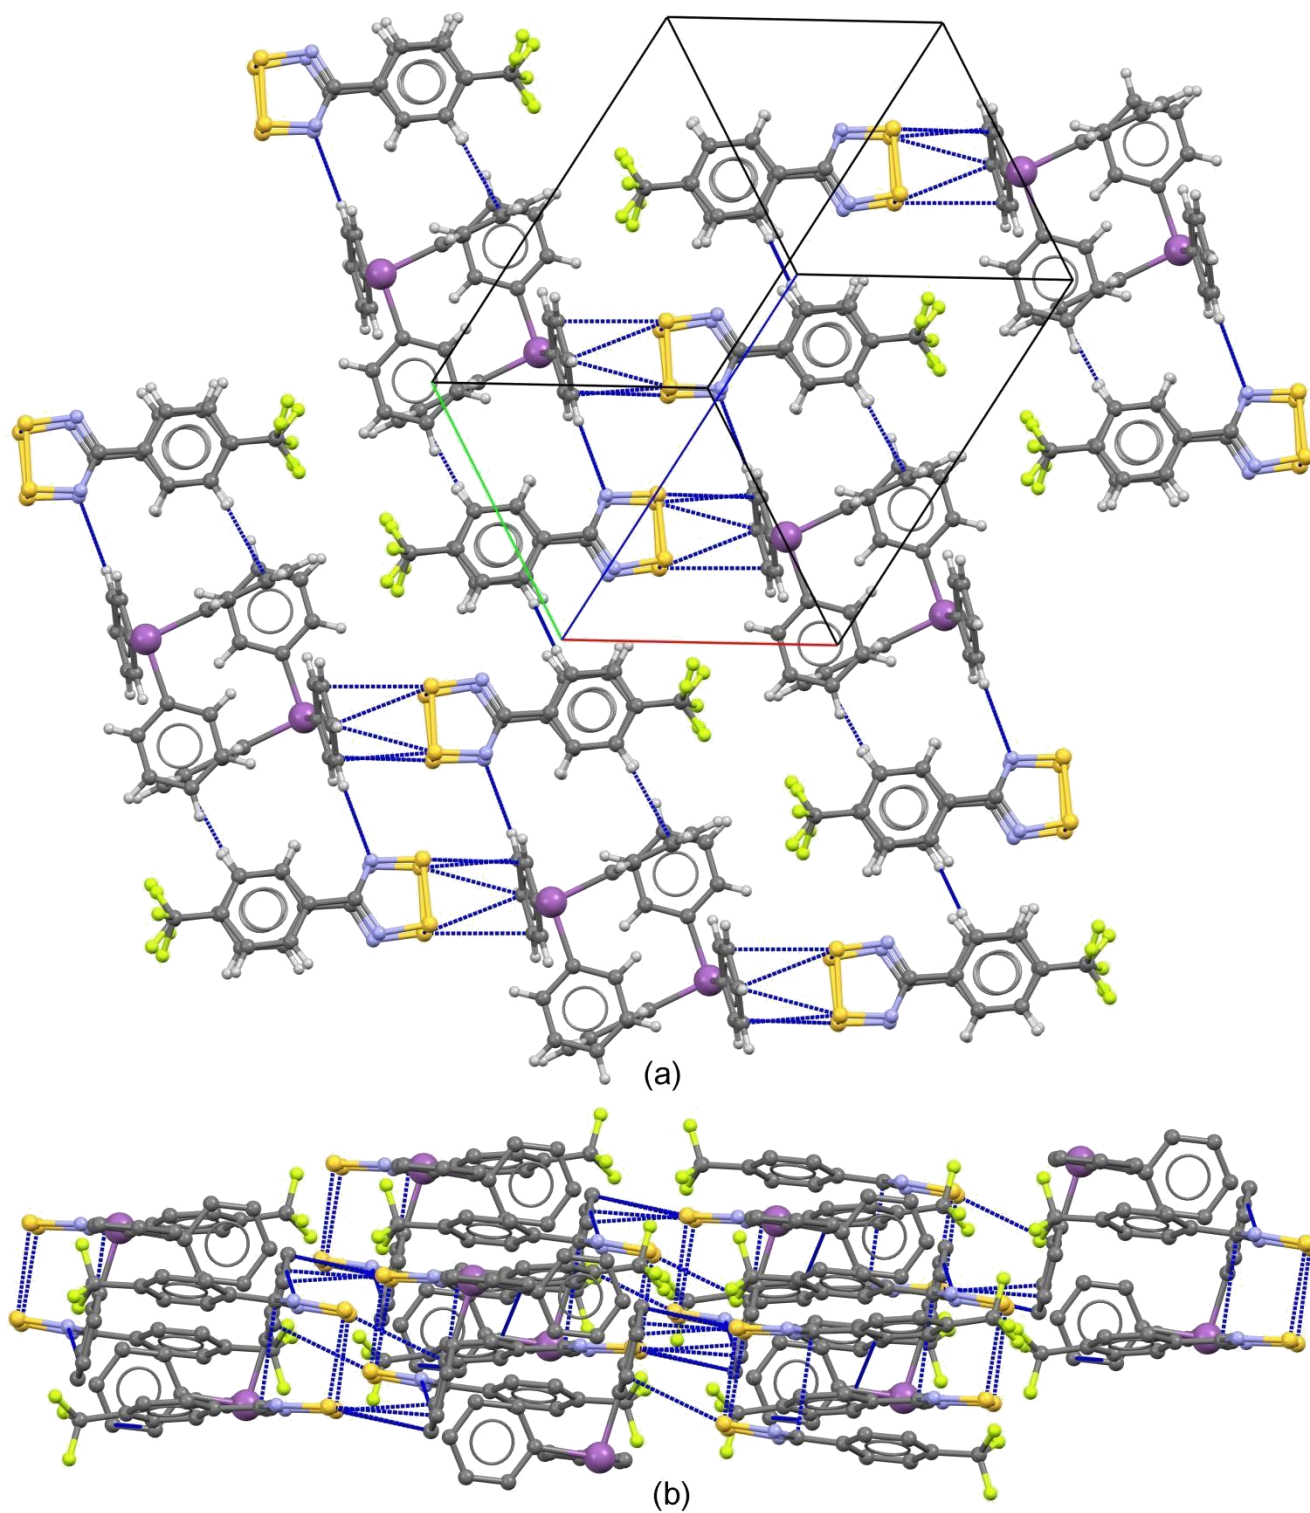

**Figure S5.** Two views of the layer structure in the crystal lattice of **2**. The slice, which is  $\sim 8.0$  Å thick and lies along the (1 1 0) Miller plane, contains the centrosymmetric  $(\text{DTDA})_2(\text{Ph}_3\text{Sb})_2$ . It is presented from (a) a top view and (b) a side view. The unit cell boundaries are also shown. In this structure, the closest inter-layer contacts are  $\text{S}\cdots\text{F}$  at 3.231 (9) Å due to an offset packing that precludes any long-range  $\text{S}\cdots\text{S}$  interactions.

**Table S2.** Intermolecular Contacts in **2** less than  $\Sigma r_{vdW}$  (except for intermolecular  $\text{Ph}_3\text{Sb}$ )

| Atom1                        | Atom2 | Symm. op. 1 | Symm. op. 2       | Length          | Length- $\Sigma r_{vdW}$ |
|------------------------------|-------|-------------|-------------------|-----------------|--------------------------|
| Intra-Dimer                  |       |             |                   |                 |                          |
| S1                           | S11   | x,y,z       | x,y,z             | 3.044(1)        | -0.556                   |
| S2                           | S12   | x,y,z       | x,y,z             | 3.0913(9)       | -0.509                   |
| C1                           | C11   | x,y,z       | x,y,z             | 3.380(3)        | -0.02                    |
|                              |       |             | <i>Mean(s.u.)</i> | <i>3.068(1)</i> | <i>-0.53</i>             |
| Dimer-to-end neighbour       |       |             |                   |                 |                          |
| S11                          | C44   | x,y,z       | x,y,z             | 3.168(3)        | -0.332                   |
| S11                          | C43   | x,y,z       | x,y,z             | 3.360(3)        | -0.14                    |
| S12                          | C43   | x,y,z       | x,y,z             | 3.388(4)        | -0.112                   |
| S1                           | C45   | x,y,z       | x,y,z             | 3.458(3)        | -0.042                   |
| S12                          | C42   | x,y,z       | x,y,z             | 3.464(3)        | -0.036                   |
|                              |       |             | <i>Mean(s.u.)</i> | <i>3.37(11)</i> | <i>-0.13(11)</i>         |
| Dimer to side neighbour      |       |             |                   |                 |                          |
| H16                          | C34   | x,y,z       | 1-x,1-y,1-z       | 2.742           | -0.158                   |
| N1                           | H44   | x,y,z       | 1-x,1-y,1-z       | 2.686           | -0.064                   |
| Inter-slice                  |       |             |                   |                 |                          |
| F2                           | S12   | x,y,z       | -1+x,y,z          | 3.231(9)        | -0.039                   |
| Inter $\text{Ph}_3\text{Sb}$ |       |             |                   |                 |                          |
| H22                          | C43   | x,y,z       | 2-x,-y,1-z        | 2.915           | +0.015                   |
| C32                          | H41   | x,y,z       | 2-x,-y,1-z        | 2.932           | +0.032                   |
| H22                          | C44   | x,y,z       | 2-x,-y,1-z        | 2.995           | +0.095                   |

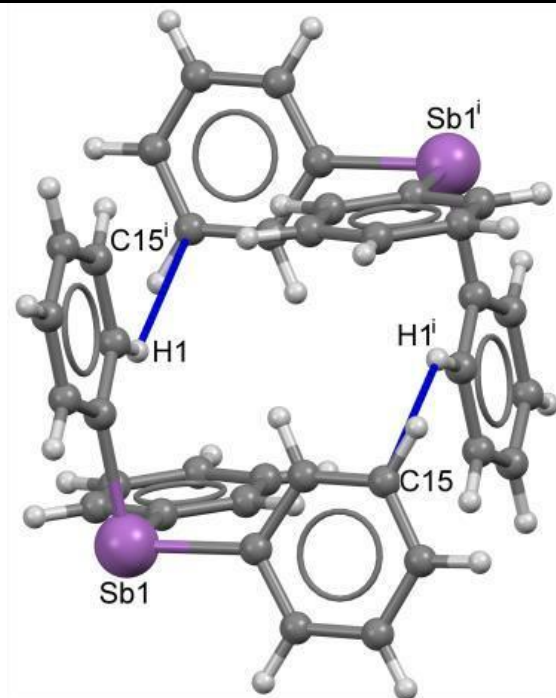**Figure S6.** Depiction of one of the centrosymmetric pseudo-cuboidal units found in the monoclinic form of **3** (refcode: ZZEHEA02)<sup>26</sup> which may be compared to **1** in Figure 1. [Symmetry code: (i), 1-x,-y,1-z.]

**Table S3.** Summary of Natural Population Analysis in a model system for **2**.

| Atom | No | Charge   | Core    | Valence | Rydberg | Total    |
|------|----|----------|---------|---------|---------|----------|
| S    | 1  | 0.46284  | 9.99912 | 5.46648 | 0.0716  | 15.53716 |
| S    | 2  | 0.46687  | 9.99913 | 5.46319 | 0.0708  | 15.53313 |
| N    | 3  | -0.71607 | 1.9994  | 5.656   | 0.0607  | 7.71607  |
| N    | 4  | -0.7048  | 1.99938 | 5.64458 | 0.0608  | 7.7048   |
| C    | 5  | 0.49662  | 1.99911 | 3.46804 | 0.0362  | 5.50338  |
| C    | 6  | -0.11434 | 1.99907 | 4.0725  | 0.0428  | 6.11434  |
| C    | 7  | -0.13465 | 1.99903 | 4.11892 | 0.0167  | 6.13465  |
| H    | 8  | 0.19407  | 0       | 0.80359 | 0.0023  | 0.80593  |
| C    | 9  | -0.15825 | 1.99903 | 4.14237 | 0.0169  | 6.15825  |
| H    | 10 | 0.19013  | 0       | 0.80713 | 0.0027  | 0.80987  |
| C    | 11 | -0.10664 | 1.99896 | 4.08368 | 0.024   | 6.10664  |
| C    | 12 | -0.15995 | 1.99902 | 4.1445  | 0.0164  | 6.15995  |
| H    | 13 | 0.19026  | 0       | 0.80697 | 0.0028  | 0.80974  |
| C    | 14 | -0.12985 | 1.99903 | 4.11327 | 0.0176  | 6.12985  |
| H    | 15 | 0.19433  | 0       | 0.80314 | 0.0025  | 0.80567  |
| C    | 16 | 1.01014  | 1.99921 | 2.93246 | 0.0582  | 4.98986  |
| F    | 17 | -0.32332 | 1.99989 | 7.3104  | 0.013   | 9.32332  |
| F    | 18 | -0.31723 | 1.99989 | 7.30622 | 0.0111  | 9.31723  |
| F    | 19 | -0.34664 | 1.99991 | 7.33546 | 0.0113  | 9.34664  |
| S    | 20 | 0.46868  | 9.99912 | 5.46016 | 0.072   | 15.53132 |
| S    | 21 | 0.46922  | 9.99913 | 5.46051 | 0.0712  | 15.53078 |
| N    | 22 | -0.71008 | 1.9994  | 5.65088 | 0.0598  | 7.71008  |
| N    | 23 | -0.70609 | 1.99939 | 5.64654 | 0.0602  | 7.70609  |
| C    | 24 | 0.49605  | 1.99911 | 3.46982 | 0.035   | 5.50395  |
| C    | 25 | -0.10808 | 1.99906 | 4.06609 | 0.0429  | 6.10808  |
| C    | 26 | -0.12959 | 1.99903 | 4.11333 | 0.0172  | 6.12959  |
| H    | 27 | 0.19504  | 0       | 0.80251 | 0.0025  | 0.80496  |
| C    | 28 | -0.14988 | 1.99902 | 4.13402 | 0.0168  | 6.14988  |
| H    | 29 | 0.19302  | 0       | 0.80421 | 0.0028  | 0.80698  |
| C    | 30 | -0.12312 | 1.99894 | 4.10079 | 0.0234  | 6.12312  |
| C    | 31 | -0.14986 | 1.99903 | 4.13436 | 0.0165  | 6.14986  |
| H    | 32 | 0.19027  | 0       | 0.80703 | 0.0027  | 0.80973  |
| C    | 33 | -0.14171 | 1.99902 | 4.12629 | 0.0164  | 6.14171  |
| H    | 34 | 0.1955   | 0       | 0.8022  | 0.0023  | 0.8045   |
| C    | 35 | 1.01492  | 1.99915 | 2.92881 | 0.0571  | 4.98508  |
| F    | 36 | -0.33182 | 1.9999  | 7.32075 | 0.0112  | 9.33182  |
| F    | 37 | -0.34173 | 1.99991 | 7.33036 | 0.0115  | 9.34173  |
| F    | 38 | -0.33275 | 1.9999  | 7.32284 | 0.01    | 9.33275  |
| C    | 39 | -0.20323 | 1.99924 | 4.18559 | 0.0184  | 6.20323  |
| C    | 40 | -0.17295 | 1.99912 | 4.1565  | 0.0173  | 6.17295  |
| H    | 41 | 0.17907  | 0       | 0.81852 | 0.0024  | 0.82093  |
| C    | 42 | -0.16968 | 1.99915 | 4.15528 | 0.0153  | 6.16968  |
| H    | 43 | 0.1798   | 0       | 0.81784 | 0.0024  | 0.8202   |



|       |      |          |          |          |        |         |
|-------|------|----------|----------|----------|--------|---------|
| C     | 44   | -0.17936 | 1.99916  | 4.16384  | 0.0164 | 6.17936 |
| H     | 45   | 0.18021  | 0        | 0.81732  | 0.0025 | 0.81979 |
| C     | 46   | -0.1818  | 1.99913  | 4.16438  | 0.0183 | 6.1818  |
| H     | 47   | 0.18112  | 0        | 0.81648  | 0.0024 | 0.81888 |
| C     | 48   | -0.18725 | 1.99912  | 4.17028  | 0.0178 | 6.18725 |
| H     | 49   | 0.17939  | 0        | 0.81825  | 0.0024 | 0.82061 |
| H     | 50   | 0.21321  | 0        | 0.78525  | 0.0015 | 0.78679 |
| * Tot | al * | 0.01003  | 103.9732 | 186.8299 | 1.1868 | 291.99  |

Determined by a PBE/PBE/6-311+g(2df,2p) DFT calculations in Gaussian W03. The numbering scheme for the DFT calculation is shown below.

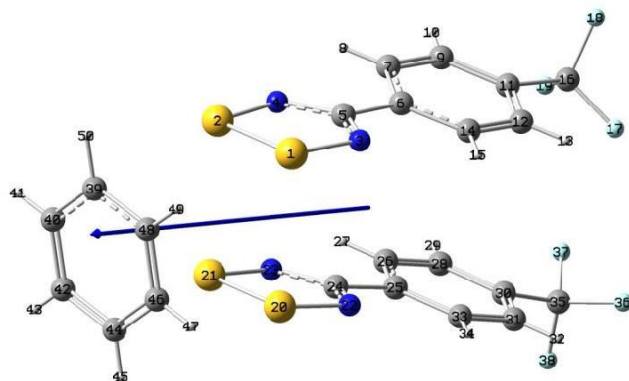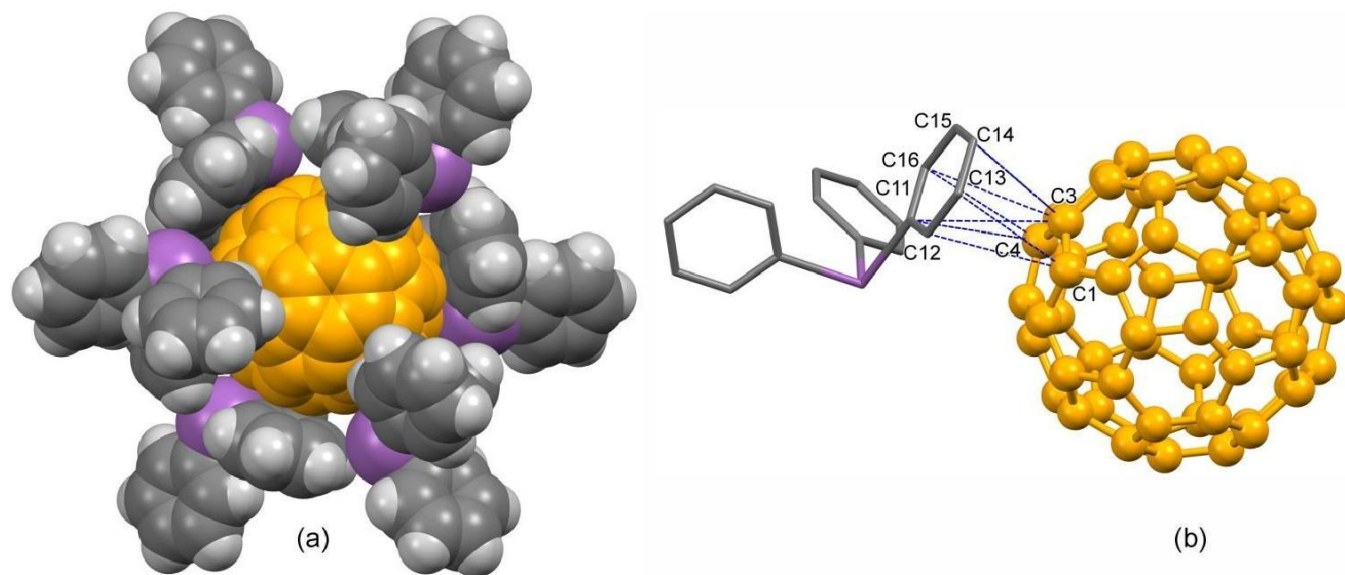

**Figure S7.** Another view of the  $C_{60} \cdot 6Ph_3Sb$  structure which shares such a close similarity in the interaction of a negative charge region above the Ph ring and the positively charged 6:5 junction point in the fullerene (the latter is rendered orange for contrast).

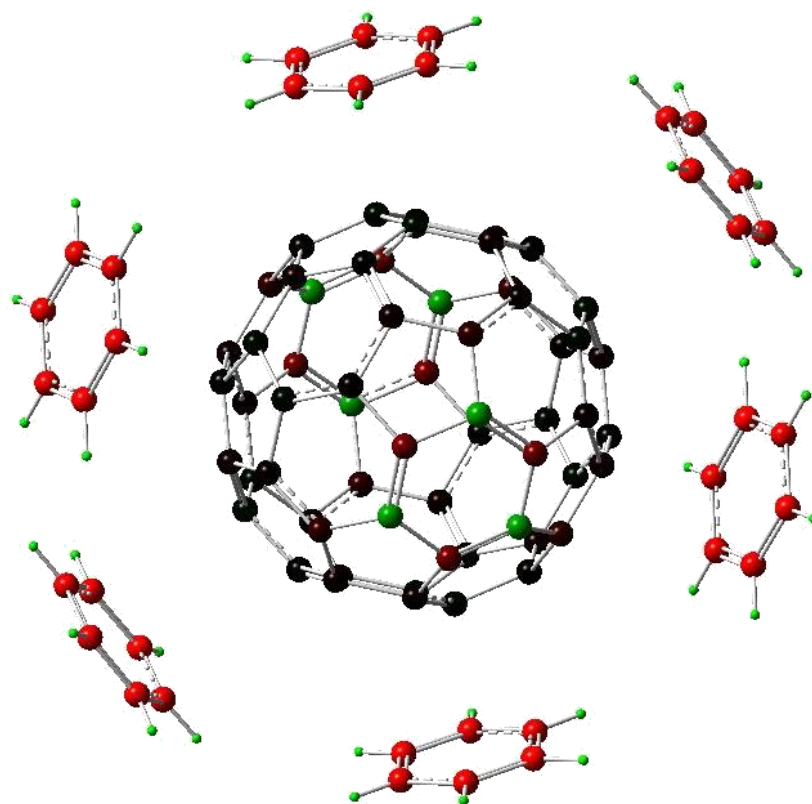

**Figure S8.** PBEPBE/6-311+g(2df,2p) DFT calculated NPA charge distribution in  $C_{60} : 6 C_6H_6$  at the geometry of the  $Ph_3Sb$  phenyl rings in YIKVET. Each benzene ring is centred over a 6:5 ring junction in  $C_{60}$ .

**Table S4.** Summary of Natural Population Analysis in a model system for **4** where six  $C_6H_6$  replace six  $Ph_3Sb$ .

| Atom      | No | Charge   | Core    | Valence | Rydberg | Total   |
|-----------|----|----------|---------|---------|---------|---------|
| C benzene | 1  | -0.19977 | 1.99922 | 4.18313 | 0.01742 | 6.19977 |
| C benzene | 2  | -0.17842 | 1.99915 | 4.16298 | 0.0163  | 6.17842 |
| C benzene | 3  | -0.18049 | 1.99916 | 4.16537 | 0.01596 | 6.18049 |
| C benzene | 4  | -0.18135 | 1.99917 | 4.16622 | 0.01596 | 6.18135 |
| C benzene | 5  | -0.17535 | 1.99917 | 4.16005 | 0.01614 | 6.17535 |
| C benzene | 6  | -0.18165 | 1.99914 | 4.16623 | 0.01628 | 6.18165 |
| H         | 7  | 0.17935  | 0       | 0.81835 | 0.0023  | 0.82065 |
| H         | 8  | 0.18311  | 0       | 0.81467 | 0.00222 | 0.81689 |
| H         | 9  | 0.18198  | 0       | 0.81577 | 0.00224 | 0.81802 |
| H         | 10 | 0.18045  | 0       | 0.81724 | 0.00231 | 0.81955 |
| H         | 11 | 0.18262  | 0       | 0.81524 | 0.00215 | 0.81738 |
| C         | 12 | -0.19982 | 1.99922 | 4.18318 | 0.01742 | 6.19982 |
| C         | 13 | -0.17841 | 1.99915 | 4.16296 | 0.0163  | 6.17841 |
| C         | 14 | -0.1805  | 1.99916 | 4.16538 | 0.01596 | 6.1805  |
| C         | 15 | -0.18132 | 1.99917 | 4.16619 | 0.01596 | 6.18132 |
| C         | 16 | -0.17534 | 1.99917 | 4.16004 | 0.01614 | 6.17534 |
| C         | 17 | -0.18166 | 1.99914 | 4.16624 | 0.01628 | 6.18166 |
| H         | 18 | 0.17935  | 0       | 0.81835 | 0.0023  | 0.82065 |
| H         | 19 | 0.18312  | 0       | 0.81466 | 0.00222 | 0.81688 |

|   |    |          |         |         |         |         |
|---|----|----------|---------|---------|---------|---------|
| H | 20 | 0.18198  | 0       | 0.81578 | 0.00224 | 0.81802 |
| H | 21 | 0.18044  | 0       | 0.81724 | 0.00231 | 0.81956 |
| H | 22 | 0.18262  | 0       | 0.81523 | 0.00215 | 0.81738 |
| C | 23 | -0.19979 | 1.99922 | 4.18315 | 0.01742 | 6.19979 |
| C | 24 | -0.17838 | 1.99915 | 4.16293 | 0.0163  | 6.17838 |
| C | 25 | -0.18048 | 1.99916 | 4.16535 | 0.01596 | 6.18048 |
| C | 26 | -0.18136 | 1.99917 | 4.16623 | 0.01596 | 6.18136 |
| C | 27 | -0.17538 | 1.99917 | 4.16008 | 0.01614 | 6.17538 |
| C | 28 | -0.1817  | 1.99914 | 4.16628 | 0.01628 | 6.1817  |
| H | 29 | 0.17934  | 0       | 0.81835 | 0.0023  | 0.82066 |
| H | 30 | 0.18313  | 0       | 0.81465 | 0.00222 | 0.81687 |
| H | 31 | 0.18199  | 0       | 0.81577 | 0.00224 | 0.81801 |
| H | 32 | 0.18046  | 0       | 0.81723 | 0.00231 | 0.81954 |
| H | 33 | 0.18262  | 0       | 0.81524 | 0.00215 | 0.81738 |
| C | 34 | -0.19978 | 1.99922 | 4.18314 | 0.01742 | 6.19978 |
| C | 35 | -0.17843 | 1.99915 | 4.16298 | 0.0163  | 6.17843 |
| C | 36 | -0.18048 | 1.99916 | 4.16536 | 0.01596 | 6.18048 |
| C | 37 | -0.18136 | 1.99917 | 4.16623 | 0.01596 | 6.18136 |
| C | 38 | -0.17538 | 1.99917 | 4.16008 | 0.01614 | 6.17538 |
| C | 39 | -0.18162 | 1.99914 | 4.16621 | 0.01628 | 6.18162 |
| H | 40 | 0.17934  | 0       | 0.81835 | 0.0023  | 0.82066 |
| H | 41 | 0.18309  | 0       | 0.81469 | 0.00222 | 0.81691 |
| H | 42 | 0.18199  | 0       | 0.81577 | 0.00224 | 0.81801 |
| H | 43 | 0.18044  | 0       | 0.81724 | 0.00231 | 0.81956 |
| H | 44 | 0.1826   | 0       | 0.81525 | 0.00215 | 0.8174  |
| C | 45 | -0.19982 | 1.99922 | 4.18317 | 0.01742 | 6.19982 |
| C | 46 | -0.1784  | 1.99915 | 4.16296 | 0.0163  | 6.1784  |
| C | 47 | -0.18048 | 1.99916 | 4.16536 | 0.01596 | 6.18048 |
| C | 48 | -0.18132 | 1.99917 | 4.16619 | 0.01596 | 6.18132 |
| C | 49 | -0.17535 | 1.99917 | 4.16005 | 0.01614 | 6.17535 |
| C | 50 | -0.18165 | 1.99914 | 4.16623 | 0.01628 | 6.18165 |
| H | 51 | 0.17935  | 0       | 0.81835 | 0.0023  | 0.82065 |
| H | 52 | 0.1831   | 0       | 0.81468 | 0.00222 | 0.8169  |
| H | 53 | 0.18199  | 0       | 0.81576 | 0.00224 | 0.81801 |
| H | 54 | 0.18044  | 0       | 0.81724 | 0.00231 | 0.81956 |
| H | 55 | 0.18263  | 0       | 0.81523 | 0.00215 | 0.81737 |
| C | 56 | -0.19981 | 1.99922 | 4.18317 | 0.01742 | 6.19981 |
| C | 57 | -0.17838 | 1.99915 | 4.16293 | 0.0163  | 6.17838 |
| C | 58 | -0.18045 | 1.99916 | 4.16532 | 0.01596 | 6.18045 |
| C | 59 | -0.18135 | 1.99917 | 4.16622 | 0.01596 | 6.18135 |
| C | 60 | -0.17537 | 1.99917 | 4.16007 | 0.01614 | 6.17537 |
| C | 61 | -0.18169 | 1.99914 | 4.16628 | 0.01628 | 6.18169 |
| H | 62 | 0.17934  | 0       | 0.81835 | 0.0023  | 0.82066 |
| H | 63 | 0.1831   | 0       | 0.81468 | 0.00222 | 0.8169  |
| H | 64 | 0.182    | 0       | 0.81575 | 0.00224 | 0.818   |
| H | 65 | 0.18046  | 0       | 0.81723 | 0.00231 | 0.81954 |

|               |     |          |         |         |         |         |
|---------------|-----|----------|---------|---------|---------|---------|
| H             | 66  | 0.18262  | 0       | 0.81523 | 0.00215 | 0.81738 |
| C 6:5 junct.  | 67  | 0.0019   | 1.99857 | 3.97641 | 0.02312 | 5.9981  |
| C             | 68  | -0.01059 | 1.99859 | 3.98873 | 0.02328 | 6.01059 |
| C 6:5 junct.  | 69  | 0.00839  | 1.99857 | 3.96869 | 0.02435 | 5.99161 |
| C adj. to 6:5 | 70  | 0.00674  | 1.9986  | 3.97142 | 0.02324 | 5.99326 |
| C             | 71  | -0.00562 | 1.99859 | 3.98517 | 0.02185 | 6.00562 |
| C             | 72  | -0.01102 | 1.99857 | 3.99137 | 0.02107 | 6.01102 |
| C             | 73  | -0.03324 | 1.99867 | 4.00493 | 0.02964 | 6.03324 |
| C             | 74  | 0.11304  | 1.9986  | 3.86035 | 0.02802 | 5.88696 |
| C             | 75  | -0.08405 | 1.99875 | 4.04732 | 0.03798 | 6.08405 |
| C             | 76  | -0.00436 | 1.99859 | 3.98388 | 0.0219  | 6.00436 |
| C             | 77  | 0.00805  | 1.99857 | 3.96904 | 0.02435 | 5.99195 |
| C             | 78  | -0.01078 | 1.99859 | 3.98893 | 0.02327 | 6.01078 |
| C             | 79  | -0.01122 | 1.99857 | 3.99156 | 0.02108 | 6.01122 |
| C             | 80  | -0.00651 | 1.99859 | 3.98607 | 0.02185 | 6.00651 |
| C             | 81  | -0.00465 | 1.99859 | 3.98418 | 0.02189 | 6.00465 |
| C             | 82  | -0.08264 | 1.99875 | 4.04592 | 0.03797 | 6.08264 |
| C             | 83  | -0.08219 | 1.99875 | 4.04546 | 0.03798 | 6.08219 |
| C             | 84  | 0.11401  | 1.9986  | 3.85935 | 0.02804 | 5.88599 |
| C             | 85  | 0.11488  | 1.9986  | 3.85849 | 0.02802 | 5.88512 |
| C             | 86  | -0.03415 | 1.99867 | 4.00584 | 0.02964 | 6.03415 |
| C             | 87  | 0.00098  | 1.99857 | 3.97734 | 0.02312 | 5.99902 |
| C             | 88  | 0.00678  | 1.9986  | 3.97138 | 0.02323 | 5.99322 |
| C             | 89  | 0.00154  | 1.99857 | 3.97677 | 0.02312 | 5.99846 |
| C             | 90  | -0.03326 | 1.99867 | 4.00493 | 0.02966 | 6.03326 |
| C             | 91  | 0.00618  | 1.9986  | 3.97199 | 0.02323 | 5.99382 |
| C             | 92  | -0.00571 | 1.99859 | 3.98527 | 0.02185 | 6.00571 |
| C             | 93  | 0.11491  | 1.9986  | 3.85846 | 0.02802 | 5.88509 |
| C             | 94  | 0.11397  | 1.9986  | 3.85939 | 0.02804 | 5.88603 |
| C             | 95  | -0.08223 | 1.99875 | 4.0455  | 0.03798 | 6.08223 |
| C             | 96  | -0.08263 | 1.99875 | 4.04591 | 0.03797 | 6.08263 |
| C             | 97  | -0.01    | 1.99857 | 3.99033 | 0.02109 | 6.01    |
| C             | 98  | -0.01033 | 1.99859 | 3.98848 | 0.02327 | 6.01033 |
| C             | 99  | -0.00466 | 1.99859 | 3.98417 | 0.02189 | 6.00466 |
| C             | 100 | 0.0085   | 1.99857 | 3.96858 | 0.02435 | 5.9915  |
| C             | 101 | -0.00468 | 1.99859 | 3.98419 | 0.02189 | 6.00468 |
| C             | 102 | -0.00996 | 1.99857 | 3.9903  | 0.02109 | 6.00996 |
| C             | 103 | -0.03417 | 1.99867 | 4.00586 | 0.02964 | 6.03417 |
| C             | 104 | -0.08407 | 1.99875 | 4.04734 | 0.03798 | 6.08407 |
| C             | 105 | -0.03333 | 1.99867 | 4.005   | 0.02966 | 6.03333 |
| C             | 106 | -0.00653 | 1.99859 | 3.98609 | 0.02185 | 6.00653 |
| C             | 107 | 0.11297  | 1.9986  | 3.86042 | 0.02802 | 5.88703 |
| C             | 108 | -0.00571 | 1.99859 | 3.98527 | 0.02185 | 6.00571 |
| C             | 109 | 0.00842  | 1.99857 | 3.96866 | 0.02434 | 5.99158 |
| C             | 110 | -0.01039 | 1.99859 | 3.98854 | 0.02327 | 6.01039 |
| C             | 111 | 0.00685  | 1.9986  | 3.97132 | 0.02323 | 5.99315 |

|         |     |          |          |          |         |          |
|---------|-----|----------|----------|----------|---------|----------|
| C       | 112 | 0.00101  | 1.99857  | 3.9773   | 0.02312 | 5.99899  |
| C       | 113 | -0.00443 | 1.99859  | 3.98395  | 0.0219  | 6.00443  |
| C       | 114 | -0.00563 | 1.99859  | 3.98519  | 0.02185 | 6.00563  |
| C       | 115 | -0.01123 | 1.99857  | 3.99158  | 0.02108 | 6.01123  |
| C       | 116 | -0.01102 | 1.99857  | 3.99138  | 0.02107 | 6.01102  |
| C       | 117 | -0.03321 | 1.99867  | 4.0049   | 0.02964 | 6.03321  |
| C       | 118 | 0.00618  | 1.9986   | 3.97198  | 0.02323 | 5.99382  |
| C       | 119 | 0.00157  | 1.99857  | 3.97675  | 0.02311 | 5.99843  |
| C       | 120 | 0.00809  | 1.99857  | 3.969    | 0.02434 | 5.99191  |
| C       | 121 | -0.01056 | 1.99859  | 3.98869  | 0.02328 | 6.01056  |
| C       | 122 | 0.0067   | 1.9986   | 3.97146  | 0.02323 | 5.9933   |
| C       | 123 | 0.00175  | 1.99857  | 3.97656  | 0.02312 | 5.99825  |
| C       | 124 | -0.00465 | 1.99859  | 3.98418  | 0.02189 | 6.00465  |
| C       | 125 | -0.01086 | 1.99859  | 3.98901  | 0.02327 | 6.01086  |
| C       | 126 | 0.00846  | 1.99857  | 3.96864  | 0.02434 | 5.99154  |
| H       | 127 | 0.20794  | 0        | 0.79028  | 0.00178 | 0.79206  |
| H       | 128 | 0.20793  | 0        | 0.79029  | 0.00178 | 0.79207  |
| H       | 129 | 0.20793  | 0        | 0.79029  | 0.00178 | 0.79207  |
| H       | 130 | 0.20793  | 0        | 0.79028  | 0.00178 | 0.79207  |
| H       | 131 | 0.20793  | 0        | 0.79029  | 0.00178 | 0.79207  |
| H       | 132 | 0.20794  | 0        | 0.79028  | 0.00178 | 0.79206  |
| * Total |     | 0.00195  | 191.8866 | 417.9184 | 2.19301 | 611.9981 |

Determined by a PBE/PBE/6-311+g(2df,2p) DFT calculations in Gaussian W03. The numbering scheme for the DFT calculation is shown below.

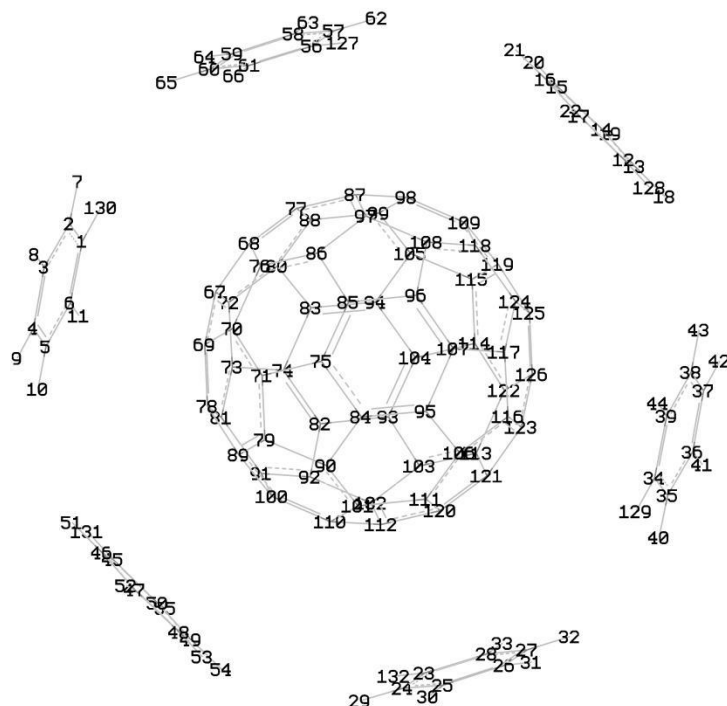

## Details of the Crystal Structure Refinement of 1

There are four independent dimers (i.e. eight different monomeric dithiadiazolyl radicals comprise the asymmetric unit of this structure.) Of these, one dimer displays CF<sub>3</sub> group (rotational) disorder, specifically involving the C(36)F<sub>3</sub> and C(46)F<sub>3</sub> CF<sub>3</sub> groups, also identifiable as the two heterocycles containing S6 S8. This disorder could be described adequately a two-part disorder model but to get reasonable geometries (employing SADI restraints) it was found necessary to include the CF<sub>3</sub> carbon atoms in the model. EADP restraints were required to keep the displacement ellipsoids of these two C atoms well behaved, namely C36/C36A and C46/C46A. In addition, a strong tendency for the fluorine atoms to go oblate or NPD was solved by applying the newly developed RIGU restraints in ShelXL-2014, which have been applied globally to this structure. Refined occupancies for the C(36) set is 0.70 (major) and 0.30 (minor); for C(46) is 0.60 (major) and 0.40 (minor).

The SADI restraints on 1,2 C–F and 1,3 F–F distances permitted the two CF<sub>3</sub> groups to rotate apart without requiring the two rotamers to be staggered. The combination of this approach provided a successful disorder model which is depicted in Figure S9. In the final difference Fourier map, the highest peak of 0.47 e/Å<sup>3</sup> at (0.3534 0.4237 0.0106) bridges between S13 and S14, whilst the deepest hole of -0.46 e/Å<sup>3</sup> is at (0.5938 0.4677 0.0595) is about 0.85 Å from S10. Thus they are associated with the heaviest atoms in the unit cell and are *not* associated with the CF<sub>3</sub> groups. This is considered a positive indication of the adequacy of the disorder models applied to the trifluoromethyl groups.

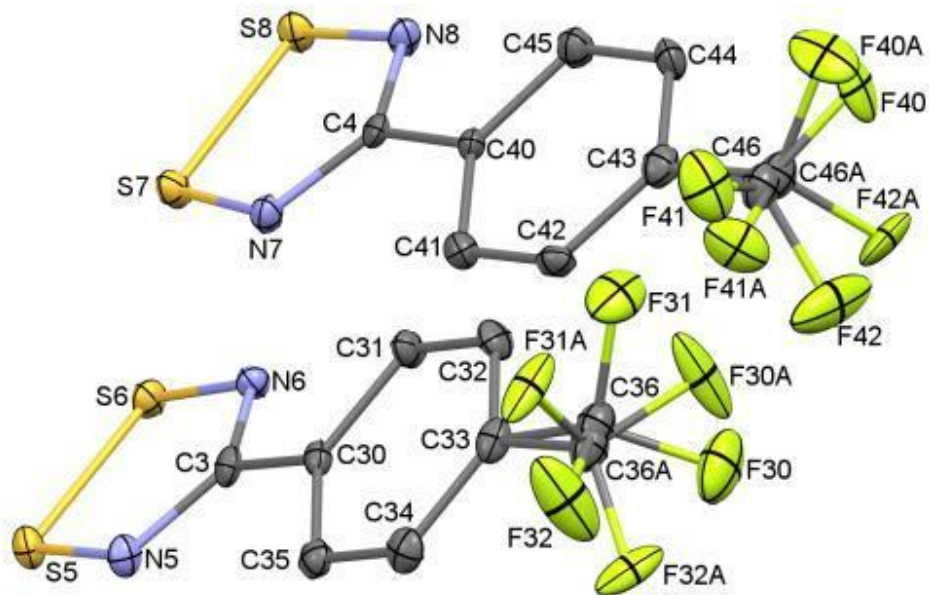

**Figure S9.** Depiction of the two-component disorder models developed for the CF<sub>3</sub> groups of the dimer involving S6 S8. The remaining three DTDA dimers exhibited ordered CF<sub>3</sub> groups in the structure at 173 K.

**Table S5.** Crystal structure report for **1****Table S5A.** Crystal data and structure refinement for **1**

|                                   |                                             |                                 |
|-----------------------------------|---------------------------------------------|---------------------------------|
| Empirical formula                 | C8 H4 F3 N2 S2                              |                                 |
| Formula weight                    | 249.25                                      |                                 |
| Temperature                       | 173(2) K                                    |                                 |
| Wavelength                        | 0.71073 Å                                   |                                 |
| Crystal system                    | Triclinic                                   |                                 |
| Space group                       | P-1                                         |                                 |
| Unit cell dimensions              | a = 9.4916(9) Å                             | $\alpha = 91.5790(10)^\circ$ .  |
|                                   | b = 18.1887(17) Å                           | $\beta = 97.3290(10)^\circ$ .   |
|                                   | c = 22.275(2) Å                             | $\gamma = 102.7550(10)^\circ$ . |
| Volume                            | 3713.8(6) Å <sup>3</sup>                    |                                 |
| Z                                 | 16                                          |                                 |
| Density (calculated)              | 1.783 Mg/m <sup>3</sup>                     |                                 |
| Absorption coefficient            | 0.583 mm <sup>-1</sup>                      |                                 |
| F(000)                            | 2000                                        |                                 |
| Crystal size                      | 0.180 x 0.100 x 0.040 mm <sup>3</sup>       |                                 |
| Theta range for data collection   | 1.847 to 26.220°.                           |                                 |
| Index ranges                      | -11 ≤ h ≤ 11, -22 ≤ k ≤ 22, -27 ≤ l ≤ 27    |                                 |
| Reflections collected             | 39140                                       |                                 |
| Independent reflections           | 14828 [R(int) = 0.0812]                     |                                 |
| Completeness to theta = 25.500°   | 99.6 %                                      |                                 |
| Refinement method                 | Full-matrix least-squares on F <sup>2</sup> |                                 |
| Data / restraints / parameters    | 14828 / 1034 / 1137                         |                                 |
| Goodness-of-fit on F <sup>2</sup> | 0.973                                       |                                 |
| Final R indices [I > 2σ(I)]       | R1 = 0.0540, wR2 = 0.0930                   |                                 |
| R indices (all data)              | R1 = 0.1396, wR2 = 0.1185                   |                                 |
| Extinction coefficient            | n/a                                         |                                 |
| Largest diff. peak and hole       | 0.470 and -0.456 e.Å <sup>-3</sup>          |                                 |

**Table S5B** Atomic coordinates ( $\times 10^4$ ) and equivalent isotropic displacement parameters ( $\text{\AA}^2 \times 10^3$ ) for **1**. U(eq) is defined as one third of the trace of the orthogonalized  $U^{ij}$  tensor.

|       | x        | y        | z       | U(eq) |
|-------|----------|----------|---------|-------|
| S(1)  | 5498(1)  | 2298(1)  | 4562(1) | 18(1) |
| S(2)  | 6117(1)  | 1267(1)  | 4535(1) | 15(1) |
| N(1)  | 5510(4)  | 2409(2)  | 3842(2) | 17(1) |
| N(2)  | 6146(4)  | 1237(2)  | 3805(2) | 14(1) |
| C(1)  | 5847(4)  | 1845(3)  | 3532(2) | 14(1) |
| C(10) | 5825(4)  | 1904(3)  | 2873(2) | 12(1) |
| C(11) | 5856(5)  | 2598(3)  | 2625(2) | 16(1) |
| C(12) | 5761(4)  | 2661(3)  | 2005(2) | 16(1) |
| C(13) | 5646(5)  | 2029(3)  | 1628(2) | 14(1) |
| C(14) | 5654(5)  | 1339(3)  | 1870(2) | 16(1) |
| C(15) | 5749(5)  | 1273(3)  | 2490(2) | 15(1) |
| C(16) | 5469(5)  | 2092(3)  | 958(2)  | 21(1) |
| F(11) | 4070(3)  | 2010(2)  | 719(1)  | 37(1) |
| F(10) | 6143(3)  | 2776(2)  | 798(1)  | 33(1) |
| F(12) | 5988(4)  | 1593(2)  | 666(1)  | 49(1) |
| S(3)  | 2314(1)  | 1435(1)  | 4395(1) | 19(1) |
| S(4)  | 2958(1)  | 412(1)   | 4403(1) | 18(1) |
| N(3)  | 2132(4)  | 1460(2)  | 3658(2) | 18(1) |
| N(4)  | 2902(4)  | 321(2)   | 3668(2) | 16(1) |
| C(2)  | 2450(5)  | 872(3)   | 3372(2) | 16(1) |
| C(20) | 2253(4)  | 828(3)   | 2703(2) | 13(1) |
| C(21) | 2040(5)  | 1451(3)  | 2389(2) | 14(1) |
| C(22) | 1748(5)  | 1405(3)  | 1760(2) | 14(1) |
| C(24) | 1934(5)  | 105(3)   | 1762(2) | 19(1) |
| C(23) | 1682(5)  | 726(3)   | 1450(2) | 18(1) |
| C(25) | 2235(5)  | 162(3)   | 2385(2) | 17(1) |
| C(26) | 1267(5)  | 628(3)   | 781(2)  | 23(1) |
| F(20) | 2298(3)  | 421(2)   | 498(1)  | 35(1) |
| F(21) | 1015(3)  | 1249(2)  | 524(1)  | 34(1) |
| F(22) | 54(3)    | 88(2)    | 630(1)  | 50(1) |
| S(5)  | -1507(1) | 10264(1) | 4339(1) | 17(1) |
| S(6)  | -1683(1) | 10295(1) | 3396(1) | 17(1) |



|        |          |          |         |       |
|--------|----------|----------|---------|-------|
| N(5)   | -750(4)  | 9538(2)  | 4370(2) | 16(1) |
| N(6)   | -861(4)  | 9612(2)  | 3318(2) | 15(1) |
| C(3)   | -481(5)  | 9297(3)  | 3832(2) | 15(1) |
| C(30)  | 266(5)   | 8675(2)  | 3803(2) | 14(1) |
| C(34)  | 1108(5)  | 7628(3)  | 4239(2) | 20(1) |
| C(32)  | 1475(5)  | 7935(3)  | 3222(2) | 20(1) |
| C(33)  | 1634(5)  | 7487(3)  | 3709(2) | 17(1) |
| C(31)  | 803(5)   | 8518(3)  | 3273(2) | 18(1) |
| C(35)  | 437(5)   | 8228(3)  | 4292(2) | 17(1) |
| C(36)  | 2331(8)  | 6838(4)  | 3611(3) | 24(1) |
| F(30)  | 1398(5)  | 6254(3)  | 3298(3) | 45(2) |
| F(31)  | 3436(5)  | 6986(2)  | 3283(2) | 39(2) |
| F(32)  | 2835(7)  | 6575(3)  | 4120(2) | 59(2) |
| C(36A) | 2258(15) | 6802(8)  | 3700(6) | 24(1) |
| F(30A) | 2155(15) | 6535(7)  | 3130(5) | 41(4) |
| F(31A) | 3670(10) | 7012(5)  | 3918(5) | 34(3) |
| F(32A) | 1675(10) | 6234(5)  | 4012(5) | 28(3) |
| S(7)   | 5251(1)  | 9278(1)  | 4169(1) | 17(1) |
| S(8)   | 5280(1)  | 9281(1)  | 3237(1) | 17(1) |
| N(7)   | 5918(4)  | 8522(2)  | 4256(2) | 17(1) |
| N(8)   | 5933(4)  | 8531(2)  | 3202(2) | 16(1) |
| C(4)   | 6183(5)  | 8229(3)  | 3735(2) | 14(1) |
| C(43)  | 7730(5)  | 6209(3)  | 3697(2) | 20(1) |
| C(40)  | 6747(5)  | 7531(2)  | 3740(2) | 13(1) |
| C(45)  | 7169(5)  | 7284(3)  | 3210(2) | 20(1) |
| C(42)  | 7347(5)  | 6460(3)  | 4231(2) | 17(1) |
| C(44)  | 7649(5)  | 6619(3)  | 3187(2) | 22(1) |
| C(41)  | 6859(5)  | 7120(3)  | 4255(2) | 18(1) |
| C(46)  | 8221(10) | 5480(5)  | 3708(4) | 24(1) |
| F(40)  | 8545(11) | 5295(6)  | 3158(4) | 32(2) |
| F(41)  | 9412(10) | 5489(5)  | 4104(3) | 35(2) |
| F(42)  | 7212(8)  | 4895(3)  | 3839(6) | 50(3) |
| C(46A) | 8131(14) | 5464(7)  | 3607(6) | 24(1) |
| F(40A) | 9090(15) | 5465(11) | 3217(6) | 34(3) |
| F(41A) | 8715(17) | 5259(8)  | 4127(5) | 36(3) |
| F(42A) | 6987(9)  | 4914(5)  | 3396(8) | 38(3) |
| S(9)   | 7104(1)  | 4824(1)  | 1760(1) | 18(1) |

|       |          |          |         |       |
|-------|----------|----------|---------|-------|
| S(10) | 6761(1)  | 4735(1)  | 814(1)  | 18(1) |
| N(9)  | 6330(4)  | 5533(2)  | 1806(2) | 18(1) |
| N(10) | 5972(4)  | 5441(2)  | 749(2)  | 16(1) |
| C(5)  | 5829(5)  | 5759(3)  | 1275(2) | 13(1) |
| C(51) | 4931(5)  | 6735(3)  | 1817(2) | 21(1) |
| C(52) | 4240(5)  | 7333(3)  | 1824(2) | 23(1) |
| C(50) | 5083(5)  | 6397(3)  | 1274(2) | 15(1) |
| C(53) | 3702(5)  | 7587(3)  | 1285(2) | 17(1) |
| C(54) | 3832(5)  | 7241(3)  | 735(2)  | 18(1) |
| C(55) | 4525(5)  | 6649(3)  | 730(2)  | 17(1) |
| C(56) | 2989(5)  | 8235(3)  | 1277(2) | 23(1) |
| F(51) | 3721(3)  | 8829(2)  | 1030(2) | 45(1) |
| F(50) | 2782(4)  | 8461(2)  | 1819(1) | 63(1) |
| F(52) | 1671(3)  | 8078(2)  | 940(2)  | 44(1) |
| S(11) | 10195(1) | 5808(1)  | 1777(1) | 18(1) |
| S(12) | 9879(1)  | 5740(1)  | 836(1)  | 16(1) |
| N(11) | 9582(4)  | 6572(2)  | 1832(2) | 18(1) |
| N(12) | 9211(4)  | 6494(2)  | 770(2)  | 15(1) |
| C(6)  | 9147(5)  | 6836(3)  | 1302(2) | 14(1) |
| C(63) | 7705(5)  | 8893(3)  | 1409(2) | 15(1) |
| C(60) | 8625(4)  | 7545(2)  | 1326(2) | 12(1) |
| C(61) | 8695(5)  | 7912(3)  | 1887(2) | 23(1) |
| C(62) | 8241(5)  | 8579(3)  | 1928(2) | 22(1) |
| C(64) | 7662(5)  | 8528(3)  | 850(2)  | 21(1) |
| C(66) | 7254(5)  | 9617(3)  | 1482(2) | 20(1) |
| C(65) | 8104(5)  | 7857(3)  | 806(2)  | 17(1) |
| F(60) | 6275(3)  | 9571(2)  | 1868(1) | 30(1) |
| F(61) | 6665(3)  | 9844(2)  | 965(1)  | 32(1) |
| F(62) | 8373(3)  | 10178(2) | 1718(1) | 39(1) |
| S(13) | 7679(1)  | 5352(1)  | 9463(1) | 18(1) |
| S(14) | 7063(1)  | 6380(1)  | 9448(1) | 19(1) |
| N(13) | 7534(4)  | 5226(2)  | 8728(2) | 17(1) |
| N(14) | 6797(4)  | 6382(2)  | 8714(2) | 18(1) |
| C(7)  | 7081(4)  | 5783(3)  | 8431(2) | 13(1) |
| C(70) | 6842(4)  | 5715(3)  | 7762(2) | 13(1) |
| C(73) | 6366(5)  | 5592(3)  | 6506(2) | 16(1) |
| C(71) | 6700(5)  | 5019(3)  | 7454(2) | 16(1) |

|       |          |         |         |       |
|-------|----------|---------|---------|-------|
| C(74) | 6520(5)  | 6288(3) | 6808(2) | 17(1) |
| C(72) | 6449(5)  | 4962(3) | 6832(2) | 17(1) |
| C(75) | 6749(4)  | 6345(3) | 7427(2) | 16(1) |
| C(76) | 6128(5)  | 5494(3) | 5827(2) | 24(1) |
| F(70) | 5719(3)  | 6088(2) | 5569(1) | 35(1) |
| F(71) | 7341(3)  | 5437(2) | 5603(1) | 32(1) |
| F(72) | 5139(3)  | 4874(2) | 5629(1) | 48(1) |
| S(15) | 850(1)   | 6191(1) | 9513(1) | 15(1) |
| S(16) | 240(1)   | 7223(1) | 9546(1) | 18(1) |
| N(15) | 845(4)   | 6155(2) | 8776(2) | 15(1) |
| N(16) | 212(4)   | 7327(2) | 8825(2) | 16(1) |
| C(8)  | 521(5)   | 6759(3) | 8511(2) | 15(1) |
| C(80) | 489(4)   | 6820(3) | 7847(2) | 13(1) |
| C(83) | 310(4)   | 6951(3) | 6610(2) | 15(1) |
| C(81) | 342(4)   | 6185(3) | 7462(2) | 14(1) |
| C(84) | 468(5)   | 7583(3) | 6988(2) | 17(1) |
| C(85) | 569(5)   | 7525(3) | 7605(2) | 14(1) |
| C(86) | 127(5)   | 7027(3) | 5935(2) | 20(1) |
| C(82) | 254(4)   | 6249(3) | 6844(2) | 15(1) |
| F(80) | -1256(3) | 7021(2) | 5708(1) | 27(1) |
| F(82) | 505(3)   | 6485(2) | 5627(1) | 40(1) |
| F(81) | 900(3)   | 7689(2) | 5778(1) | 32(1) |

---

**Table S5C.** Bond lengths [Å] and angles [°] for **1**

|             |            |               |            |
|-------------|------------|---------------|------------|
| S(1)-N(1)   | 1.623(4)   | C(23)-C(26)   | 1.488(6)   |
| S(1)-S(2)   | 2.0880(17) | C(25)-H(25)   | 0.9500     |
| S(2)-N(2)   | 1.628(4)   | C(26)-F(21)   | 1.335(5)   |
| N(1)-C(1)   | 1.338(5)   | C(26)-F(22)   | 1.336(5)   |
| N(2)-C(1)   | 1.343(5)   | C(26)-F(20)   | 1.342(5)   |
| C(1)-C(10)  | 1.474(6)   | S(5)-N(5)     | 1.637(4)   |
| C(10)-C(11) | 1.387(6)   | S(5)-S(6)     | 2.0881(17) |
| C(10)-C(15) | 1.396(6)   | S(6)-N(6)     | 1.623(4)   |
| C(11)-C(12) | 1.384(6)   | N(5)-C(3)     | 1.337(5)   |
| C(11)-H(11) | 0.9500     | N(6)-C(3)     | 1.339(5)   |
| C(12)-C(13) | 1.381(6)   | C(3)-C(30)    | 1.467(6)   |
| C(12)-H(12) | 0.9500     | C(30)-C(35)   | 1.390(6)   |
| C(13)-C(14) | 1.380(6)   | C(30)-C(31)   | 1.391(6)   |
| C(13)-C(16) | 1.491(6)   | C(34)-C(33)   | 1.377(6)   |
| C(14)-C(15) | 1.382(6)   | C(34)-C(35)   | 1.390(6)   |
| C(14)-H(14) | 0.9500     | C(34)-H(34)   | 0.9500     |
| C(15)-H(15) | 0.9500     | C(32)-C(31)   | 1.363(6)   |
| C(16)-F(12) | 1.317(5)   | C(32)-C(33)   | 1.387(6)   |
| C(16)-F(11) | 1.340(5)   | C(32)-H(32)   | 0.9500     |
| C(16)-F(10) | 1.348(5)   | C(33)-C(36A)  | 1.494(16)  |
| S(3)-N(3)   | 1.631(4)   | C(33)-C(36)   | 1.498(9)   |
| S(3)-S(4)   | 2.0841(18) | C(31)-H(31)   | 0.9500     |
| S(4)-N(4)   | 1.634(4)   | C(35)-H(35)   | 0.9500     |
| N(3)-C(2)   | 1.339(6)   | C(36)-F(32)   | 1.318(8)   |
| N(4)-C(2)   | 1.332(5)   | C(36)-F(30)   | 1.337(8)   |
| C(2)-C(20)  | 1.477(6)   | C(36)-F(31)   | 1.337(8)   |
| C(20)-C(25) | 1.382(6)   | C(36A)-F(32A) | 1.319(13)  |
| C(20)-C(21) | 1.387(6)   | C(36A)-F(30A) | 1.331(14)  |
| C(21)-C(22) | 1.390(6)   | C(36A)-F(31A) | 1.332(14)  |
| C(21)-H(21) | 0.9500     | S(7)-N(7)     | 1.641(4)   |
| C(22)-C(23) | 1.383(6)   | S(7)-S(8)     | 2.0803(17) |
| C(22)-H(22) | 0.9500     | S(8)-N(8)     | 1.622(4)   |
| C(24)-C(25) | 1.378(6)   | N(7)-C(4)     | 1.338(5)   |
| C(24)-C(23) | 1.392(6)   | N(8)-C(4)     | 1.338(5)   |
| C(24)-H(24) | 0.9500     | C(4)-C(40)    | 1.484(6)   |

|               |            |             |            |
|---------------|------------|-------------|------------|
| C(43)-C(44)   | 1.380(6)   | C(56)-F(52) | 1.342(5)   |
| C(43)-C(42)   | 1.382(6)   | S(11)-N(11) | 1.628(4)   |
| C(43)-C(46)   | 1.499(10)  | S(11)-S(12) | 2.0758(17) |
| C(43)-C(46A)  | 1.502(14)  | S(12)-N(12) | 1.636(4)   |
| C(40)-C(45)   | 1.387(6)   | N(11)-C(6)  | 1.339(5)   |
| C(40)-C(41)   | 1.391(6)   | N(12)-C(6)  | 1.338(5)   |
| C(45)-C(44)   | 1.386(6)   | C(6)-C(60)  | 1.482(6)   |
| C(45)-H(45)   | 0.9500     | C(63)-C(64) | 1.386(6)   |
| C(42)-C(41)   | 1.382(6)   | C(63)-C(62) | 1.389(6)   |
| C(42)-H(42)   | 0.9500     | C(63)-C(66) | 1.484(6)   |
| C(44)-H(44)   | 0.9500     | C(60)-C(65) | 1.387(6)   |
| C(41)-H(41)   | 0.9500     | C(60)-C(61) | 1.387(6)   |
| C(46)-F(42)   | 1.332(10)  | C(61)-C(62) | 1.379(6)   |
| C(46)-F(41)   | 1.339(9)   | C(61)-H(61) | 0.9500     |
| C(46)-F(40)   | 1.351(10)  | C(62)-H(62) | 0.9500     |
| C(46A)-F(41A) | 1.317(13)  | C(64)-C(65) | 1.379(6)   |
| C(46A)-F(42A) | 1.329(13)  | C(64)-H(64) | 0.9500     |
| C(46A)-F(40A) | 1.336(13)  | C(66)-F(61) | 1.331(5)   |
| S(9)-N(9)     | 1.626(4)   | C(66)-F(60) | 1.336(5)   |
| S(9)-S(10)    | 2.0884(18) | C(66)-F(62) | 1.340(5)   |
| S(10)-N(10)   | 1.625(4)   | C(65)-H(65) | 0.9500     |
| N(9)-C(5)     | 1.329(5)   | S(13)-N(13) | 1.629(4)   |
| N(10)-C(5)    | 1.328(5)   | S(13)-S(14) | 2.0785(18) |
| C(5)-C(50)    | 1.486(6)   | S(14)-N(14) | 1.623(4)   |
| C(51)-C(50)   | 1.380(6)   | N(13)-C(7)  | 1.344(5)   |
| C(51)-C(52)   | 1.389(6)   | N(14)-C(7)  | 1.337(5)   |
| C(51)-H(51)   | 0.9500     | C(7)-C(70)  | 1.477(6)   |
| C(52)-C(53)   | 1.377(6)   | C(70)-C(71) | 1.394(6)   |
| C(52)-H(52)   | 0.9500     | C(70)-C(75) | 1.397(6)   |
| C(50)-C(55)   | 1.391(6)   | C(73)-C(72) | 1.384(6)   |
| C(53)-C(54)   | 1.395(6)   | C(73)-C(74) | 1.387(6)   |
| C(53)-C(56)   | 1.482(6)   | C(73)-C(76) | 1.501(6)   |
| C(54)-C(55)   | 1.380(6)   | C(71)-C(72) | 1.374(6)   |
| C(54)-H(54)   | 0.9500     | C(71)-H(71) | 0.9500     |
| C(55)-H(55)   | 0.9500     | C(74)-C(75) | 1.366(6)   |
| C(56)-F(50)   | 1.318(5)   | C(74)-H(74) | 0.9500     |
| C(56)-F(51)   | 1.323(5)   | C(72)-H(72) | 0.9500     |

|                   |            |                   |           |
|-------------------|------------|-------------------|-----------|
| C(75)-H(75)       | 0.9500     | C(10)-C(11)-H(11) | 119.7     |
| C(76)-F(72)       | 1.321(5)   | C(13)-C(12)-C(11) | 119.7(4)  |
| C(76)-F(71)       | 1.334(5)   | C(13)-C(12)-H(12) | 120.1     |
| C(76)-F(70)       | 1.346(6)   | C(11)-C(12)-H(12) | 120.1     |
| S(15)-N(15)       | 1.641(4)   | C(14)-C(13)-C(12) | 120.2(4)  |
| S(15)-S(16)       | 2.0846(17) | C(14)-C(13)-C(16) | 120.2(4)  |
| S(16)-N(16)       | 1.619(4)   | C(12)-C(13)-C(16) | 119.5(4)  |
| N(15)-C(8)        | 1.337(6)   | C(13)-C(14)-C(15) | 120.3(4)  |
| N(16)-C(8)        | 1.337(6)   | C(13)-C(14)-H(14) | 119.8     |
| C(8)-C(80)        | 1.484(6)   | C(15)-C(14)-H(14) | 119.8     |
| C(80)-C(81)       | 1.391(6)   | C(14)-C(15)-C(10) | 119.9(4)  |
| C(80)-C(85)       | 1.395(6)   | C(14)-C(15)-H(15) | 120.1     |
| C(83)-C(84)       | 1.376(6)   | C(10)-C(15)-H(15) | 120.1     |
| C(83)-C(82)       | 1.385(6)   | F(12)-C(16)-F(11) | 106.9(4)  |
| C(83)-C(86)       | 1.505(6)   | F(12)-C(16)-F(10) | 106.3(4)  |
| C(81)-C(82)       | 1.377(6)   | F(11)-C(16)-F(10) | 104.7(4)  |
| C(81)-H(81)       | 0.9500     | F(12)-C(16)-C(13) | 113.5(4)  |
| C(84)-C(85)       | 1.376(6)   | F(11)-C(16)-C(13) | 112.4(4)  |
| C(84)-H(84)       | 0.9500     | F(10)-C(16)-C(13) | 112.4(4)  |
| C(85)-H(85)       | 0.9500     | N(3)-S(3)-S(4)    | 94.18(15) |
| C(86)-F(82)       | 1.323(5)   | N(4)-S(4)-S(3)    | 94.89(15) |
| C(86)-F(80)       | 1.342(5)   | C(2)-N(3)-S(3)    | 114.5(3)  |
| C(86)-F(81)       | 1.345(5)   | C(2)-N(4)-S(4)    | 113.8(3)  |
| C(82)-H(82)       | 0.9500     | N(4)-C(2)-N(3)    | 122.6(4)  |
|                   |            | N(4)-C(2)-C(20)   | 119.1(4)  |
| N(1)-S(1)-S(2)    | 94.35(15)  | N(3)-C(2)-C(20)   | 118.3(4)  |
| N(2)-S(2)-S(1)    | 94.57(14)  | C(25)-C(20)-C(21) | 119.6(4)  |
| C(1)-N(1)-S(1)    | 114.9(3)   | C(25)-C(20)-C(2)  | 120.4(4)  |
| C(1)-N(2)-S(2)    | 114.4(3)   | C(21)-C(20)-C(2)  | 120.0(4)  |
| N(1)-C(1)-N(2)    | 121.7(4)   | C(20)-C(21)-C(22) | 120.9(4)  |
| N(1)-C(1)-C(10)   | 117.2(4)   | C(20)-C(21)-H(21) | 119.6     |
| N(2)-C(1)-C(10)   | 121.1(4)   | C(22)-C(21)-H(21) | 119.6     |
| C(11)-C(10)-C(15) | 119.2(4)   | C(23)-C(22)-C(21) | 118.8(4)  |
| C(11)-C(10)-C(1)  | 119.5(4)   | C(23)-C(22)-H(22) | 120.6     |
| C(15)-C(10)-C(1)  | 121.3(4)   | C(21)-C(22)-H(22) | 120.6     |
| C(12)-C(11)-C(10) | 120.6(4)   | C(25)-C(24)-C(23) | 119.9(4)  |
| C(12)-C(11)-H(11) | 119.7      | C(25)-C(24)-H(24) | 120.1     |

|                    |           |                      |           |
|--------------------|-----------|----------------------|-----------|
| C(23)-C(24)-H(24)  | 120.1     | C(30)-C(35)-C(34)    | 119.8(5)  |
| C(22)-C(23)-C(24)  | 120.6(4)  | C(30)-C(35)-H(35)    | 120.1     |
| C(22)-C(23)-C(26)  | 121.1(4)  | C(34)-C(35)-H(35)    | 120.1     |
| C(24)-C(23)-C(26)  | 118.2(4)  | F(32)-C(36)-F(30)    | 106.3(6)  |
| C(24)-C(25)-C(20)  | 120.3(4)  | F(32)-C(36)-F(31)    | 106.5(6)  |
| C(24)-C(25)-H(25)  | 119.9     | F(30)-C(36)-F(31)    | 103.3(6)  |
| C(20)-C(25)-H(25)  | 119.9     | F(32)-C(36)-C(33)    | 113.2(6)  |
| F(21)-C(26)-F(22)  | 106.5(4)  | F(30)-C(36)-C(33)    | 112.0(6)  |
| F(21)-C(26)-F(20)  | 106.1(4)  | F(31)-C(36)-C(33)    | 114.8(6)  |
| F(22)-C(26)-F(20)  | 106.2(4)  | F(32A)-C(36A)-F(30A) | 107.1(11) |
| F(21)-C(26)-C(23)  | 113.8(4)  | F(32A)-C(36A)-F(31A) | 107.4(11) |
| F(22)-C(26)-C(23)  | 111.3(4)  | F(30A)-C(36A)-F(31A) | 107.7(11) |
| F(20)-C(26)-C(23)  | 112.4(4)  | F(32A)-C(36A)-C(33)  | 117.0(11) |
| N(5)-S(5)-S(6)     | 94.68(15) | F(30A)-C(36A)-C(33)  | 109.4(11) |
| N(6)-S(6)-S(5)     | 94.13(14) | F(31A)-C(36A)-C(33)  | 107.8(10) |
| C(3)-N(5)-S(5)     | 113.9(3)  | N(7)-S(7)-S(8)       | 94.95(15) |
| C(3)-N(6)-S(6)     | 115.1(3)  | N(8)-S(8)-S(7)       | 94.51(14) |
| N(5)-C(3)-N(6)     | 122.0(4)  | C(4)-N(7)-S(7)       | 113.2(3)  |
| N(5)-C(3)-C(30)    | 119.3(4)  | C(4)-N(8)-S(8)       | 114.5(3)  |
| N(6)-C(3)-C(30)    | 118.7(4)  | N(7)-C(4)-N(8)       | 122.8(4)  |
| C(35)-C(30)-C(31)  | 118.9(4)  | N(7)-C(4)-C(40)      | 119.3(4)  |
| C(35)-C(30)-C(3)   | 121.5(4)  | N(8)-C(4)-C(40)      | 117.9(4)  |
| C(31)-C(30)-C(3)   | 119.6(4)  | C(44)-C(43)-C(42)    | 120.5(4)  |
| C(33)-C(34)-C(35)  | 120.1(5)  | C(44)-C(43)-C(46)    | 122.9(6)  |
| C(33)-C(34)-H(34)  | 120.0     | C(42)-C(43)-C(46)    | 116.5(5)  |
| C(35)-C(34)-H(34)  | 120.0     | C(44)-C(43)-C(46A)   | 115.2(6)  |
| C(31)-C(32)-C(33)  | 119.5(5)  | C(42)-C(43)-C(46A)   | 124.0(7)  |
| C(31)-C(32)-H(32)  | 120.2     | C(45)-C(40)-C(41)    | 119.6(4)  |
| C(33)-C(32)-H(32)  | 120.2     | C(45)-C(40)-C(4)     | 118.3(4)  |
| C(34)-C(33)-C(32)  | 120.3(4)  | C(41)-C(40)-C(4)     | 122.1(4)  |
| C(34)-C(33)-C(36A) | 114.7(7)  | C(44)-C(45)-C(40)    | 120.3(4)  |
| C(32)-C(33)-C(36A) | 124.9(7)  | C(44)-C(45)-H(45)    | 119.9     |
| C(34)-C(33)-C(36)  | 123.2(5)  | C(40)-C(45)-H(45)    | 119.9     |
| C(32)-C(33)-C(36)  | 116.4(5)  | C(41)-C(42)-C(43)    | 120.0(4)  |
| C(32)-C(31)-C(30)  | 121.4(4)  | C(41)-C(42)-H(42)    | 120.0     |
| C(32)-C(31)-H(31)  | 119.3     | C(43)-C(42)-H(42)    | 120.0     |
| C(30)-C(31)-H(31)  | 119.3     | C(43)-C(44)-C(45)    | 119.6(5)  |

|                      |           |                   |           |
|----------------------|-----------|-------------------|-----------|
| C(43)-C(44)-H(44)    | 120.2     | C(55)-C(54)-H(54) | 120.1     |
| C(45)-C(44)-H(44)    | 120.2     | C(53)-C(54)-H(54) | 120.1     |
| C(42)-C(41)-C(40)    | 119.9(4)  | C(54)-C(55)-C(50) | 119.9(5)  |
| C(42)-C(41)-H(41)    | 120.0     | C(54)-C(55)-H(55) | 120.0     |
| C(40)-C(41)-H(41)    | 120.0     | C(50)-C(55)-H(55) | 120.0     |
| F(42)-C(46)-F(41)    | 105.7(7)  | F(50)-C(56)-F(51) | 107.5(4)  |
| F(42)-C(46)-F(40)    | 105.7(8)  | F(50)-C(56)-F(52) | 105.9(4)  |
| F(41)-C(46)-F(40)    | 106.1(8)  | F(51)-C(56)-F(52) | 103.9(4)  |
| F(42)-C(46)-C(43)    | 113.6(7)  | F(50)-C(56)-C(53) | 113.4(4)  |
| F(41)-C(46)-C(43)    | 114.5(7)  | F(51)-C(56)-C(53) | 113.0(4)  |
| F(40)-C(46)-C(43)    | 110.7(8)  | F(52)-C(56)-C(53) | 112.5(4)  |
| F(41A)-C(46A)-F(42A) | 107.3(10) | N(11)-S(11)-S(12) | 94.27(15) |
| F(41A)-C(46A)-F(40A) | 106.8(11) | N(12)-S(12)-S(11) | 95.15(14) |
| F(42A)-C(46A)-F(40A) | 105.3(10) | C(6)-N(11)-S(11)  | 114.7(3)  |
| F(41A)-C(46A)-C(43)  | 110.2(10) | C(6)-N(12)-S(12)  | 113.6(3)  |
| F(42A)-C(46A)-C(43)  | 112.6(10) | N(12)-C(6)-N(11)  | 122.2(4)  |
| F(40A)-C(46A)-C(43)  | 114.2(13) | N(12)-C(6)-C(60)  | 120.8(4)  |
| N(9)-S(9)-S(10)      | 94.02(15) | N(11)-C(6)-C(60)  | 116.9(4)  |
| N(10)-S(10)-S(9)     | 94.60(15) | C(64)-C(63)-C(62) | 118.6(4)  |
| C(5)-N(9)-S(9)       | 114.5(3)  | C(64)-C(63)-C(66) | 123.2(4)  |
| C(5)-N(10)-S(10)     | 114.0(3)  | C(62)-C(63)-C(66) | 118.1(4)  |
| N(10)-C(5)-N(9)      | 122.8(4)  | C(65)-C(60)-C(61) | 119.5(4)  |
| N(10)-C(5)-C(50)     | 119.0(4)  | C(65)-C(60)-C(6)  | 122.0(4)  |
| N(9)-C(5)-C(50)      | 118.2(4)  | C(61)-C(60)-C(6)  | 118.6(4)  |
| C(50)-C(51)-C(52)    | 120.5(5)  | C(62)-C(61)-C(60) | 120.3(4)  |
| C(50)-C(51)-H(51)    | 119.8     | C(62)-C(61)-H(61) | 119.9     |
| C(52)-C(51)-H(51)    | 119.8     | C(60)-C(61)-H(61) | 119.9     |
| C(53)-C(52)-C(51)    | 119.6(5)  | C(61)-C(62)-C(63) | 120.7(5)  |
| C(53)-C(52)-H(52)    | 120.2     | C(61)-C(62)-H(62) | 119.7     |
| C(51)-C(52)-H(52)    | 120.2     | C(63)-C(62)-H(62) | 119.7     |
| C(51)-C(50)-C(55)    | 119.9(4)  | C(65)-C(64)-C(63) | 121.1(5)  |
| C(51)-C(50)-C(5)     | 119.7(4)  | C(65)-C(64)-H(64) | 119.5     |
| C(55)-C(50)-C(5)     | 120.4(4)  | C(63)-C(64)-H(64) | 119.5     |
| C(52)-C(53)-C(54)    | 120.2(4)  | F(61)-C(66)-F(60) | 107.0(4)  |
| C(52)-C(53)-C(56)    | 120.9(5)  | F(61)-C(66)-F(62) | 107.3(4)  |
| C(54)-C(53)-C(56)    | 118.8(4)  | F(60)-C(66)-F(62) | 105.1(4)  |
| C(55)-C(54)-C(53)    | 119.9(4)  | F(61)-C(66)-C(63) | 113.5(4)  |



|                   |           |                   |           |
|-------------------|-----------|-------------------|-----------|
| F(60)-C(66)-C(63) | 111.4(4)  | F(71)-C(76)-C(73) | 112.1(4)  |
| F(62)-C(66)-C(63) | 112.0(4)  | F(70)-C(76)-C(73) | 111.9(4)  |
| C(64)-C(65)-C(60) | 119.9(4)  | N(15)-S(15)-S(16) | 94.81(14) |
| C(64)-C(65)-H(65) | 120.0     | N(16)-S(16)-S(15) | 94.24(15) |
| C(60)-C(65)-H(65) | 120.0     | C(8)-N(15)-S(15)  | 113.5(3)  |
| N(13)-S(13)-S(14) | 95.20(15) | C(8)-N(16)-S(16)  | 115.1(3)  |
| N(14)-S(14)-S(13) | 94.61(15) | N(15)-C(8)-N(16)  | 122.3(4)  |
| C(7)-N(13)-S(13)  | 113.1(3)  | N(15)-C(8)-C(80)  | 120.4(4)  |
| C(7)-N(14)-S(14)  | 114.0(3)  | N(16)-C(8)-C(80)  | 117.3(4)  |
| N(14)-C(7)-N(13)  | 123.0(4)  | C(81)-C(80)-C(85) | 119.6(4)  |
| N(14)-C(7)-C(70)  | 118.8(4)  | C(81)-C(80)-C(8)  | 121.1(4)  |
| N(13)-C(7)-C(70)  | 118.2(4)  | C(85)-C(80)-C(8)  | 119.2(4)  |
| C(71)-C(70)-C(75) | 119.0(4)  | C(84)-C(83)-C(82) | 120.7(4)  |
| C(71)-C(70)-C(7)  | 120.4(4)  | C(84)-C(83)-C(86) | 118.9(4)  |
| C(75)-C(70)-C(7)  | 120.7(4)  | C(82)-C(83)-C(86) | 120.4(4)  |
| C(72)-C(73)-C(74) | 120.1(4)  | C(82)-C(81)-C(80) | 120.3(4)  |
| C(72)-C(73)-C(76) | 117.9(4)  | C(82)-C(81)-H(81) | 119.9     |
| C(74)-C(73)-C(76) | 122.0(4)  | C(80)-C(81)-H(81) | 119.9     |
| C(72)-C(71)-C(70) | 119.7(4)  | C(83)-C(84)-C(85) | 120.2(4)  |
| C(72)-C(71)-H(71) | 120.1     | C(83)-C(84)-H(84) | 119.9     |
| C(70)-C(71)-H(71) | 120.1     | C(85)-C(84)-H(84) | 119.9     |
| C(75)-C(74)-C(73) | 119.4(4)  | C(84)-C(85)-C(80) | 119.7(4)  |
| C(75)-C(74)-H(74) | 120.3     | C(84)-C(85)-H(85) | 120.2     |
| C(73)-C(74)-H(74) | 120.3     | C(80)-C(85)-H(85) | 120.2     |
| C(71)-C(72)-C(73) | 120.6(4)  | F(82)-C(86)-F(80) | 106.5(4)  |
| C(71)-C(72)-H(72) | 119.7     | F(82)-C(86)-F(81) | 107.2(4)  |
| C(73)-C(72)-H(72) | 119.7     | F(80)-C(86)-F(81) | 104.3(4)  |
| C(74)-C(75)-C(70) | 121.2(4)  | F(82)-C(86)-C(83) | 113.6(4)  |
| C(74)-C(75)-H(75) | 119.4     | F(80)-C(86)-C(83) | 112.2(4)  |
| C(70)-C(75)-H(75) | 119.4     | F(81)-C(86)-C(83) | 112.4(4)  |
| F(72)-C(76)-F(71) | 106.2(4)  | C(81)-C(82)-C(83) | 119.5(4)  |
| F(72)-C(76)-F(70) | 108.6(4)  | C(81)-C(82)-H(82) | 120.3     |
| F(71)-C(76)-F(70) | 105.6(4)  | C(83)-C(82)-H(82) | 120.3     |
| F(72)-C(76)-C(73) | 112.1(4)  |                   |           |

**Table S5D.** Anisotropic displacement parameters ( $\text{\AA}^2 \times 10^3$ ) for **1**. The anisotropic displacement factor exponent takes the form:  $-2\pi^2 [h^2 a^{*2} U^{11} + \dots + 2 h k a^* b^* U^{12}]$

|       | U <sup>11</sup> | U <sup>22</sup> | U <sup>33</sup> | U <sup>23</sup> | U <sup>13</sup> | U <sup>12</sup> |
|-------|-----------------|-----------------|-----------------|-----------------|-----------------|-----------------|
| S(1)  | 24(1)           | 18(1)           | 13(1)           | -1(1)           | 2(1)            | 10(1)           |
| S(2)  | 17(1)           | 15(1)           | 15(1)           | 1(1)            | 2(1)            | 6(1)            |
| N(1)  | 22(2)           | 14(2)           | 16(2)           | 0(2)            | 4(2)            | 5(2)            |
| N(2)  | 17(2)           | 14(2)           | 13(2)           | 2(2)            | 4(2)            | 5(2)            |
| C(1)  | 8(2)            | 14(2)           | 18(2)           | 2(2)            | 1(2)            | 1(2)            |
| C(10) | 12(2)           | 14(2)           | 12(2)           | 0(2)            | 3(2)            | 4(2)            |
| C(11) | 16(3)           | 16(2)           | 18(2)           | 1(2)            | 2(2)            | 4(2)            |
| C(12) | 13(2)           | 15(2)           | 20(2)           | 4(2)            | 5(2)            | 4(2)            |
| C(13) | 13(2)           | 17(2)           | 15(2)           | 4(2)            | 3(2)            | 5(2)            |
| C(14) | 18(3)           | 14(2)           | 17(2)           | 0(2)            | 4(2)            | 5(2)            |
| C(15) | 17(3)           | 12(2)           | 17(2)           | 3(2)            | 5(2)            | 3(2)            |
| C(16) | 24(3)           | 19(3)           | 20(2)           | 3(2)            | 3(2)            | 5(2)            |
| F(11) | 24(2)           | 57(2)           | 22(2)           | 9(2)            | -6(1)           | -3(2)           |
| F(10) | 39(2)           | 33(2)           | 22(2)           | 10(1)           | 3(1)            | -6(2)           |
| F(12) | 99(3)           | 51(2)           | 16(2)           | 8(2)            | 19(2)           | 48(2)           |
| S(3)  | 21(1)           | 27(1)           | 14(1)           | 0(1)            | 3(1)            | 12(1)           |
| S(4)  | 20(1)           | 20(1)           | 13(1)           | 4(1)            | 2(1)            | 6(1)            |
| N(3)  | 18(2)           | 24(2)           | 16(2)           | 4(2)            | 4(2)            | 10(2)           |
| N(4)  | 19(2)           | 13(2)           | 13(2)           | 2(2)            | -1(2)           | 0(2)            |
| C(2)  | 14(2)           | 19(2)           | 16(2)           | 3(2)            | 0(2)            | 5(2)            |
| C(20) | 10(2)           | 16(2)           | 14(2)           | -1(2)           | 0(2)            | 4(2)            |
| C(21) | 15(2)           | 11(2)           | 17(2)           | -2(2)           | 0(2)            | 5(2)            |
| C(22) | 16(2)           | 14(2)           | 13(2)           | 4(2)            | 1(2)            | 4(2)            |
| C(24) | 27(3)           | 13(2)           | 17(2)           | -2(2)           | 4(2)            | 4(2)            |
| C(23) | 15(2)           | 20(2)           | 17(2)           | 1(2)            | 2(2)            | 2(2)            |
| C(25) | 15(3)           | 14(2)           | 24(2)           | 1(2)            | 1(2)            | 5(2)            |
| C(26) | 28(3)           | 25(3)           | 14(2)           | -1(2)           | -1(2)           | 5(2)            |
| F(20) | 56(2)           | 42(2)           | 15(2)           | 2(1)            | 11(1)           | 26(2)           |
| F(21) | 55(2)           | 38(2)           | 16(2)           | 5(1)            | -1(1)           | 27(2)           |
| F(22) | 51(2)           | 63(2)           | 17(2)           | -3(2)           | -5(2)           | -26(2)          |
| S(5)  | 21(1)           | 16(1)           | 14(1)           | -3(1)           | -1(1)           | 7(1)            |
| S(6)  | 22(1)           | 12(1)           | 17(1)           | 2(1)            | 3(1)            | 7(1)            |

|        |        |       |        |        |       |       |
|--------|--------|-------|--------|--------|-------|-------|
| N(5)   | 19(2)  | 14(2) | 17(2)  | 0(2)   | 0(2)  | 8(2)  |
| N(6)   | 19(2)  | 13(2) | 14(2)  | 2(2)   | 4(2)  | 5(2)  |
| C(3)   | 14(2)  | 12(2) | 16(2)  | -3(2)  | -2(2) | 2(2)  |
| C(30)  | 11(2)  | 12(2) | 16(2)  | -4(2)  | 0(2)  | 2(2)  |
| C(34)  | 19(3)  | 19(3) | 18(3)  | 0(2)   | -4(2) | 4(2)  |
| C(32)  | 23(3)  | 19(3) | 22(3)  | -2(2)  | 8(2)  | 9(2)  |
| C(33)  | 13(2)  | 14(2) | 25(3)  | -2(2)  | -1(2) | 4(2)  |
| C(31)  | 24(3)  | 13(2) | 18(2)  | 1(2)   | 7(2)  | 8(2)  |
| C(35)  | 17(3)  | 16(2) | 17(2)  | -1(2)  | -1(2) | 1(2)  |
| C(36)  | 24(2)  | 18(2) | 31(2)  | 0(2)   | 3(2)  | 8(1)  |
| F(30)  | 34(3)  | 23(3) | 76(4)  | -12(3) | 3(3)  | 10(2) |
| F(31)  | 28(3)  | 30(3) | 67(4)  | 4(2)   | 21(2) | 16(2) |
| F(32)  | 104(6) | 64(4) | 32(3)  | 9(3)   | 4(3)  | 72(4) |
| C(36A) | 24(2)  | 18(2) | 31(2)  | 0(2)   | 3(2)  | 8(1)  |
| F(30A) | 70(10) | 32(7) | 34(5)  | 2(4)   | 2(4)  | 39(6) |
| F(31A) | 16(4)  | 15(5) | 72(8)  | -5(5)  | 4(4)  | 9(3)  |
| F(32A) | 12(5)  | 18(5) | 59(6)  | 13(4)  | 9(5)  | 11(4) |
| S(7)   | 24(1)  | 16(1) | 15(1)  | 2(1)   | 5(1)  | 9(1)  |
| S(8)   | 25(1)  | 16(1) | 12(1)  | 2(1)   | 0(1)  | 8(1)  |
| N(7)   | 24(2)  | 12(2) | 15(2)  | 0(2)   | 2(2)  | 4(2)  |
| N(8)   | 25(2)  | 11(2) | 13(2)  | 2(2)   | 2(2)  | 5(2)  |
| C(4)   | 15(2)  | 11(2) | 14(2)  | -2(2)  | 1(2)  | -3(2) |
| C(43)  | 18(3)  | 17(2) | 24(2)  | 0(2)   | 3(2)  | 5(2)  |
| C(40)  | 16(2)  | 9(2)  | 13(2)  | -2(2)  | 2(2)  | 0(2)  |
| C(45)  | 27(3)  | 17(2) | 16(2)  | 0(2)   | 4(2)  | 6(2)  |
| C(42)  | 19(3)  | 18(2) | 14(2)  | 4(2)   | 2(2)  | 3(2)  |
| C(44)  | 31(3)  | 18(2) | 16(2)  | -4(2)  | 4(2)  | 5(2)  |
| C(41)  | 20(3)  | 17(2) | 15(2)  | -1(2)  | 4(2)  | 3(2)  |
| C(46)  | 24(2)  | 18(2) | 31(2)  | 0(2)   | 3(2)  | 8(1)  |
| F(40)  | 46(6)  | 29(5) | 30(3)  | -6(3)  | 0(3)  | 29(4) |
| F(41)  | 39(4)  | 34(4) | 37(3)  | 2(3)   | 1(3)  | 25(3) |
| F(42)  | 44(4)  | 19(3) | 100(8) | 14(3)  | 38(4) | 16(3) |
| C(46A) | 24(2)  | 18(2) | 31(2)  | 0(2)   | 3(2)  | 8(1)  |
| F(40A) | 25(6)  | 43(8) | 40(5)  | 2(5)   | 8(5)  | 17(5) |
| F(41A) | 45(7)  | 39(7) | 32(4)  | 9(4)   | 5(4)  | 26(6) |
| F(42A) | 26(4)  | 18(4) | 67(8)  | -3(4)  | -1(4) | 3(3)  |
| S(9)   | 23(1)  | 16(1) | 19(1)  | 4(1)   | 7(1)  | 9(1)  |

|       |        |       |       |        |       |       |
|-------|--------|-------|-------|--------|-------|-------|
| S(10) | 22(1)  | 14(1) | 19(1) | -2(1)  | 3(1)  | 7(1)  |
| N(9)  | 19(2)  | 19(2) | 19(2) | 5(2)   | 5(2)  | 5(2)  |
| N(10) | 17(2)  | 14(2) | 17(2) | -2(2)  | 0(2)  | 3(2)  |
| C(5)  | 12(2)  | 12(2) | 14(2) | -4(2)  | 3(2)  | -1(2) |
| C(51) | 26(3)  | 19(3) | 17(2) | 0(2)   | -2(2) | 9(2)  |
| C(52) | 28(3)  | 21(3) | 19(3) | -6(2)  | 0(2)  | 8(2)  |
| C(50) | 14(2)  | 12(2) | 18(2) | -1(2)  | 3(2)  | -1(2) |
| C(53) | 16(2)  | 11(2) | 25(3) | 0(2)   | 7(2)  | 1(2)  |
| C(54) | 17(3)  | 18(3) | 21(3) | 3(2)   | 0(2)  | 5(2)  |
| C(55) | 18(3)  | 18(3) | 15(2) | -1(2)  | 5(2)  | 5(2)  |
| C(56) | 26(3)  | 21(3) | 27(3) | 2(2)   | 4(2)  | 12(2) |
| F(51) | 33(2)  | 18(2) | 88(3) | 14(2)  | 15(2) | 10(1) |
| F(50) | 123(3) | 62(3) | 31(2) | 6(2)   | 17(2) | 75(2) |
| F(52) | 25(2)  | 35(2) | 71(2) | -7(2)  | -6(2) | 15(2) |
| S(11) | 26(1)  | 17(1) | 13(1) | 1(1)   | -1(1) | 9(1)  |
| S(12) | 24(1)  | 14(1) | 14(1) | 1(1)   | 5(1)  | 8(1)  |
| N(11) | 24(2)  | 18(2) | 14(2) | 1(2)   | 4(2)  | 8(2)  |
| N(12) | 18(2)  | 17(2) | 13(2) | 3(2)   | 3(2)  | 9(2)  |
| C(6)  | 11(2)  | 17(2) | 15(2) | -1(2)  | 5(2)  | 2(2)  |
| C(63) | 12(2)  | 12(2) | 22(2) | 1(2)   | 4(2)  | 1(2)  |
| C(60) | 10(2)  | 12(2) | 14(2) | 1(2)   | 6(2)  | 1(2)  |
| C(61) | 39(3)  | 21(3) | 14(2) | 4(2)   | 3(2)  | 14(2) |
| C(62) | 34(3)  | 18(3) | 17(3) | -2(2)  | 4(2)  | 10(2) |
| C(64) | 27(3)  | 20(3) | 17(3) | 4(2)   | 0(2)  | 8(2)  |
| C(66) | 23(3)  | 16(2) | 21(3) | 1(2)   | 4(2)  | 7(2)  |
| C(65) | 22(3)  | 15(2) | 12(2) | -2(2)  | 0(2)  | 4(2)  |
| F(60) | 38(2)  | 30(2) | 34(2) | 4(1)   | 16(1) | 21(2) |
| F(61) | 49(2)  | 28(2) | 26(2) | 6(1)   | 1(1)  | 23(2) |
| F(62) | 32(2)  | 14(2) | 68(2) | -11(2) | 1(2)  | 5(1)  |
| S(13) | 21(1)  | 22(1) | 12(1) | 3(1)   | 1(1)  | 6(1)  |
| S(14) | 21(1)  | 28(1) | 11(1) | -2(1)  | 1(1)  | 12(1) |
| N(13) | 21(2)  | 19(2) | 11(2) | 0(2)   | 1(2)  | 8(2)  |
| N(14) | 23(2)  | 21(2) | 11(2) | 1(2)   | 1(2)  | 10(2) |
| C(7)  | 8(2)   | 17(2) | 13(2) | -3(2)  | -1(2) | 2(2)  |
| C(70) | 8(2)   | 17(2) | 14(2) | 2(2)   | 1(2)  | 2(2)  |
| C(73) | 9(2)   | 25(3) | 13(2) | 2(2)   | 0(2)  | 1(2)  |
| C(71) | 21(3)  | 14(2) | 13(2) | 0(2)   | -1(2) | 6(2)  |

|       |       |       |       |       |       |        |
|-------|-------|-------|-------|-------|-------|--------|
| C(74) | 13(2) | 22(3) | 16(2) | 7(2)  | 2(2)  | 6(2)   |
| C(72) | 21(3) | 15(2) | 15(2) | 0(2)  | 2(2)  | 6(2)   |
| C(75) | 12(2) | 17(2) | 18(2) | -2(2) | 1(2)  | 4(2)   |
| C(76) | 25(3) | 28(3) | 17(2) | 5(2)  | 3(2)  | -2(2)  |
| F(70) | 49(2) | 44(2) | 16(2) | 4(1)  | 0(1)  | 22(2)  |
| F(71) | 45(2) | 33(2) | 23(2) | 3(1)  | 18(1) | 14(2)  |
| F(72) | 60(2) | 47(2) | 14(2) | 0(1)  | -6(2) | -28(2) |
| S(15) | 20(1) | 16(1) | 12(1) | 2(1)  | 2(1)  | 9(1)   |
| S(16) | 26(1) | 15(1) | 14(1) | 0(1)  | 2(1)  | 8(1)   |
| N(15) | 14(2) | 18(2) | 15(2) | 3(2)  | 0(2)  | 6(2)   |
| N(16) | 22(2) | 15(2) | 13(2) | 2(2)  | 0(2)  | 5(2)   |
| C(8)  | 11(2) | 16(2) | 19(2) | 1(2)  | 4(2)  | 3(2)   |
| C(80) | 9(2)  | 17(2) | 15(2) | 2(2)  | 1(2)  | 6(2)   |
| C(83) | 8(2)  | 21(2) | 16(2) | 4(2)  | 2(2)  | 4(2)   |
| C(81) | 13(2) | 17(2) | 14(2) | 4(2)  | 2(2)  | 4(2)   |
| C(84) | 14(2) | 15(2) | 23(2) | 7(2)  | 6(2)  | 1(2)   |
| C(85) | 16(2) | 13(2) | 15(2) | -1(2) | 3(2)  | 5(2)   |
| C(86) | 19(2) | 21(3) | 22(3) | 5(2)  | 4(2)  | 6(2)   |
| C(82) | 12(2) | 17(2) | 16(2) | -2(2) | 0(2)  | 5(2)   |
| F(80) | 26(2) | 32(2) | 20(2) | 7(1)  | -4(1) | 3(1)   |
| F(82) | 68(2) | 45(2) | 20(2) | 7(2)  | 16(2) | 36(2)  |
| F(81) | 35(2) | 35(2) | 19(2) | 12(1) | 5(1)  | -8(1)  |

---

**Table S5E.** Hydrogen coordinates ( $\times 10^4$ ) and isotropic displacement parameters ( $\text{\AA}^2 \times 10^3$ ) for **1**.

|       | x    | y    | z    | U(eq) |
|-------|------|------|------|-------|
| H(11) | 5943 | 3034 | 2884 | 20    |
| H(12) | 5775 | 3138 | 1838 | 19    |
| H(14) | 5595 | 908  | 1609 | 19    |
| H(15) | 5763 | 798  | 2654 | 18    |
| H(21) | 2095 | 1915 | 2606 | 17    |
| H(22) | 1597 | 1832 | 1546 | 17    |
| H(24) | 1899 | -358 | 1545 | 23    |
| H(25) | 2430 | -258 | 2598 | 21    |
| H(34) | 1205 | 7314 | 4569 | 23    |
| H(32) | 1831 | 7835 | 2856 | 24    |
| H(31) | 700  | 8825 | 2939 | 21    |
| H(35) | 96   | 8333 | 4660 | 21    |
| H(45) | 7129 | 7573 | 2862 | 24    |
| H(42) | 7420 | 6178 | 4582 | 21    |
| H(44) | 7921 | 6446 | 2821 | 26    |
| H(41) | 6599 | 7294 | 4623 | 21    |
| H(51) | 5302 | 6558 | 2188 | 25    |
| H(52) | 4139 | 7564 | 2199 | 27    |
| H(54) | 3445 | 7412 | 363  | 22    |
| H(55) | 4620 | 6414 | 356  | 20    |
| H(61) | 9058 | 7703 | 2245 | 28    |
| H(62) | 8294 | 8827 | 2314 | 27    |
| H(64) | 7324 | 8744 | 492  | 25    |
| H(65) | 8051 | 7610 | 420  | 20    |
| H(71) | 6775 | 4587 | 7674 | 19    |
| H(74) | 6466 | 6722 | 6585 | 20    |
| H(72) | 6332 | 4486 | 6622 | 20    |
| H(75) | 6847 | 6821 | 7633 | 19    |
| H(81) | 301  | 5705 | 7625 | 17    |
| H(84) | 507  | 8062 | 6821 | 21    |
| H(85) | 693  | 7964 | 7866 | 17    |
| H(82) | 157  | 5815 | 6581 | 18    |

**Table S5F.** Torsion angles [°] for **1**.

|                         |           |                              |           |
|-------------------------|-----------|------------------------------|-----------|
| S(2)-S(1)-N(1)-C(1)     | 1.3(3)    | S(1)-C(25)-C(20)-C(21)-C(22) | 2.7(7)    |
| S(2)-N(2)-C(1)          | 2.3(3)    | C(2)-C(20)-C(21)-C(22)       | -175.3(4) |
| S(1)-N(1)-C(1)-N(2)     | 0.1(5)    | C(20)-C(21)-C(22)-C(23)      | -0.4(7)   |
| S(1)-N(1)-C(1)-C(10)    | 178.0(3)  | C(21)-C(22)-C(23)-C(24)      | -1.4(7)   |
| S(2)-N(2)-C(1)-N(1)     | -2.0(5)   | C(21)-C(22)-C(23)-C(26)      | 175.5(4)  |
| S(2)-N(2)-C(1)-C(10)    | -179.8(3) | C(25)-C(24)-C(23)-C(22)      | 0.8(7)    |
| N(1)-C(1)-C(10)-C(11)   | 17.2(6)   | C(25)-C(24)-C(23)-C(26)      | -176.1(4) |
| N(2)-C(1)-C(10)-C(11)   | -164.9(4) | C(23)-C(24)-C(25)-C(20)      | 1.5(7)    |
| N(1)-C(1)-C(10)-C(15)   | -161.7(4) | C(21)-C(20)-C(25)-C(24)      | -3.3(7)   |
| N(2)-C(1)-C(10)-C(15)   | 16.2(6)   | C(2)-C(20)-C(25)-C(24)       | 174.8(4)  |
| C(15)-C(10)-C(11)-C(12) | 2.3(6)    | C(22)-C(23)-C(26)-F(21)      | 1.6(7)    |
| C(1)-C(10)-C(11)-C(12)  | -176.7(4) | C(24)-C(23)-C(26)-F(21)      | 178.5(4)  |
| C(10)-C(11)-C(12)-C(13) | -0.5(7)   | C(22)-C(23)-C(26)-F(22)      | -118.7(5) |
| C(11)-C(12)-C(13)-C(14) | -1.3(7)   | C(24)-C(23)-C(26)-F(22)      | 58.2(6)   |
| C(11)-C(12)-C(13)-C(16) | 176.9(4)  | C(22)-C(23)-C(26)-F(20)      | 122.3(5)  |
| C(12)-C(13)-C(14)-C(15) | 1.3(7)    | C(24)-C(23)-C(26)-F(20)      | -60.8(6)  |
| C(16)-C(13)-C(14)-C(15) | -176.9(4) | S(6)-S(5)-N(5)-C(3)          | 3.6(3)    |
| C(13)-C(14)-C(15)-C(10) | 0.5(7)    | S(5)-S(6)-N(6)-C(3)          | 2.7(3)    |
| C(11)-C(10)-C(15)-C(14) | -2.3(6)   | S(5)-N(5)-C(3)-N(6)          | -2.6(6)   |
| C(1)-C(10)-C(15)-C(14)  | 176.7(4)  | S(5)-N(5)-C(3)-C(30)         | 176.8(3)  |
| C(14)-C(13)-C(16)-F(12) | -29.7(6)  | S(6)-N(6)-C(3)-N(5)          | -0.7(6)   |
| C(12)-C(13)-C(16)-F(12) | 152.1(4)  | S(6)-N(6)-C(3)-C(30)         | 179.9(3)  |
| C(14)-C(13)-C(16)-F(11) | 91.8(5)   | N(5)-C(3)-C(30)-C(35)        | 13.3(6)   |
| C(12)-C(13)-C(16)-F(11) | -86.4(5)  | N(6)-C(3)-C(30)-C(35)        | -167.3(4) |
| C(14)-C(13)-C(16)-F(10) | -150.3(4) | N(5)-C(3)-C(30)-C(31)        | -167.5(4) |
| C(12)-C(13)-C(16)-F(10) | 31.4(6)   | N(6)-C(3)-C(30)-C(31)        | 11.9(6)   |
| S(4)-S(3)-N(3)-C(2)     | -0.6(3)   | C(35)-C(34)-C(33)-C(32)      | -1.1(7)   |
| S(3)-S(4)-N(4)-C(2)     | -2.4(3)   | C(35)-C(34)-C(33)-C(36A)     | -176.9(7) |
| S(4)-N(4)-C(2)-N(3)     | 2.6(6)    | C(35)-C(34)-C(33)-C(36)      | -178.2(5) |
| S(4)-N(4)-C(2)-C(20)    | -175.8(3) | C(31)-C(32)-C(33)-C(34)      | 0.4(7)    |
| S(3)-N(3)-C(2)-N(4)     | -1.1(6)   | C(31)-C(32)-C(33)-C(36A)     | 175.8(8)  |
| S(3)-N(3)-C(2)-C(20)    | 177.3(3)  | C(31)-C(32)-C(33)-C(36)      | 177.7(5)  |
| N(4)-C(2)-C(20)-C(25)   | 13.5(6)   | C(33)-C(32)-C(31)-C(30)      | -0.3(7)   |
| N(3)-C(2)-C(20)-C(25)   | -164.9(4) | C(35)-C(30)-C(31)-C(32)      | 0.7(7)    |
| N(4)-C(2)-C(20)-C(21)   | -168.4(4) | C(3)-C(30)-C(31)-C(32)       | -178.5(4) |
| N(3)-C(2)-C(20)-C(21)   | 13.1(6)   | C(31)-C(30)-C(35)-C(34)      | -1.4(6)   |

|                           |           |                           |            |
|---------------------------|-----------|---------------------------|------------|
| C(3)-C(30)-C(35)-C(34)    | 177.9(4)  | C(42)-C(43)-C(46)-F(42)   | 60.6(9)    |
| C(33)-C(34)-C(35)-C(30)   | 1.6(7)    | C(44)-C(43)-C(46)-F(41)   | 119.4(9)   |
| C(34)-C(33)-C(36)-F(32)   | -21.5(9)  | C(42)-C(43)-C(46)-F(41)   | -60.8(10)  |
| C(32)-C(33)-C(36)-F(32)   | 161.4(6)  | C(44)-C(43)-C(46)-F(40)   | -0.5(11)   |
| C(34)-C(33)-C(36)-F(30)   | 98.6(7)   | C(42)-C(43)-C(46)-F(40)   | 179.3(7)   |
| C(32)-C(33)-C(36)-F(30)   | -78.5(7)  | C(44)-C(43)-C(46A)-F(41A) | 156.0(10)  |
| C(34)-C(33)-C(36)-F(31)   | -144.0(6) | C(42)-C(43)-C(46A)-F(41A) | -29.1(14)  |
| C(32)-C(33)-C(36)-F(31)   | 38.8(8)   | C(44)-C(43)-C(46A)-F(42A) | -84.3(11)  |
| C(34)-C(33)-C(36A)-F(32A) | 31.7(13)  | C(42)-C(43)-C(46A)-F(42A) | 90.7(11)   |
| C(32)-C(33)-C(36A)-F(32A) | -143.9(9) | C(44)-C(43)-C(46A)-F(40A) | 35.8(14)   |
| C(34)-C(33)-C(36A)-F(30A) | 153.7(9)  | C(42)-C(43)-C(46A)-F(40A) | -149.3(10) |
| C(32)-C(33)-C(36A)-F(30A) | -21.8(14) | S(10)-S(9)-N(9)-C(5)      | -0.1(3)    |
| C(34)-C(33)-C(36A)-F(31A) | -89.4(10) | S(9)-S(10)-N(10)-C(5)     | -1.6(3)    |
| C(32)-C(33)-C(36A)-F(31A) | 95.1(10)  | S(10)-N(10)-C(5)-N(9)     | 2.0(6)     |
| S(8)-S(7)-N(7)-C(4)       | -0.4(3)   | S(10)-N(10)-C(5)-C(50)    | -178.2(3)  |
| S(7)-S(8)-N(8)-C(4)       | -0.3(3)   | S(9)-N(9)-C(5)-N(10)      | -1.1(6)    |
| S(7)-N(7)-C(4)-N(8)       | 0.4(6)    | S(9)-N(9)-C(5)-C(50)      | 179.1(3)   |
| S(7)-N(7)-C(4)-C(40)      | -178.2(3) | C(50)-C(51)-C(52)-C(53)   | 0.1(7)     |
| S(8)-N(8)-C(4)-N(7)       | 0.0(6)    | C(52)-C(51)-C(50)-C(55)   | -0.8(7)    |
| S(8)-N(8)-C(4)-C(40)      | 178.5(3)  | C(52)-C(51)-C(50)-C(5)    | 179.9(4)   |
| N(7)-C(4)-C(40)-C(45)     | -172.9(4) | N(10)-C(5)-C(50)-C(51)    | -179.7(4)  |
| N(8)-C(4)-C(40)-C(45)     | 8.5(6)    | N(9)-C(5)-C(50)-C(51)     | 0.0(6)     |
| N(7)-C(4)-C(40)-C(41)     | 7.3(6)    | N(10)-C(5)-C(50)-C(55)    | 1.0(6)     |
| N(8)-C(4)-C(40)-C(41)     | -171.3(4) | N(9)-C(5)-C(50)-C(55)     | -179.3(4)  |
| C(41)-C(40)-C(45)-C(44)   | 2.3(7)    | C(51)-C(52)-C(53)-C(54)   | 0.8(7)     |
| C(4)-C(40)-C(45)-C(44)    | -177.5(4) | C(51)-C(52)-C(53)-C(56)   | -178.6(4)  |
| C(44)-C(43)-C(42)-C(41)   | 0.9(7)    | C(52)-C(53)-C(54)-C(55)   | -1.1(7)    |
| C(46)-C(43)-C(42)-C(41)   | -178.8(5) | C(56)-C(53)-C(54)-C(55)   | 178.4(4)   |
| C(46A)-C(43)-C(42)-C(41)  | -173.7(7) | C(53)-C(54)-C(55)-C(50)   | 0.4(7)     |
| C(42)-C(43)-C(44)-C(45)   | -0.5(7)   | C(51)-C(50)-C(55)-C(54)   | 0.6(7)     |
| C(46)-C(43)-C(44)-C(45)   | 179.3(6)  | C(5)-C(50)-C(55)-C(54)    | 179.9(4)   |
| C(46A)-C(43)-C(44)-C(45)  | 174.6(7)  | C(52)-C(53)-C(56)-F(50)   | -7.7(7)    |
| C(40)-C(45)-C(44)-C(43)   | -1.1(7)   | C(54)-C(53)-C(56)-F(50)   | 172.8(4)   |
| C(43)-C(42)-C(41)-C(40)   | 0.2(7)    | C(52)-C(53)-C(56)-F(51)   | 114.9(5)   |
| C(45)-C(40)-C(41)-C(42)   | -1.9(7)   | C(54)-C(53)-C(56)-F(51)   | -64.6(6)   |
| C(4)-C(40)-C(41)-C(42)    | 178.0(4)  | C(52)-C(53)-C(56)-F(52)   | -127.9(5)  |
| C(44)-C(43)-C(46)-F(42)   | -119.1(8) | C(54)-C(53)-C(56)-F(52)   | 52.6(6)    |



|                         |           |                         |           |
|-------------------------|-----------|-------------------------|-----------|
| S(12)-S(11)-N(11)-C(6)  | 0.2(3)    | C(7)-C(70)-C(71)-C(72)  | 178.7(4)  |
| S(11)-S(12)-N(12)-C(6)  | 0.6(3)    | C(72)-C(73)-C(74)-C(75) | -0.2(7)   |
| S(12)-N(12)-C(6)-N(11)  | -0.6(6)   | C(76)-C(73)-C(74)-C(75) | -179.3(4) |
| S(12)-N(12)-C(6)-C(60)  | 177.5(3)  | C(70)-C(71)-C(72)-C(73) | 1.3(7)    |
| S(11)-N(11)-C(6)-N(12)  | 0.2(6)    | C(74)-C(73)-C(72)-C(71) | -0.7(7)   |
| S(11)-N(11)-C(6)-C(60)  | -178.0(3) | C(76)-C(73)-C(72)-C(71) | 178.5(4)  |
| N(12)-C(6)-C(60)-C(65)  | 3.9(7)    | C(73)-C(74)-C(75)-C(70) | 0.5(7)    |
| N(11)-C(6)-C(60)-C(65)  | -177.9(4) | C(71)-C(70)-C(75)-C(74) | 0.1(7)    |
| N(12)-C(6)-C(60)-C(61)  | -174.6(4) | C(7)-C(70)-C(75)-C(74)  | -179.6(4) |
| N(11)-C(6)-C(60)-C(61)  | 3.6(6)    | C(72)-C(73)-C(76)-F(72) | 42.8(6)   |
| C(65)-C(60)-C(61)-C(62) | 0.5(7)    | C(74)-C(73)-C(76)-F(72) | -138.1(5) |
| C(6)-C(60)-C(61)-C(62)  | 179.0(4)  | C(72)-C(73)-C(76)-F(71) | -76.6(5)  |
| C(60)-C(61)-C(62)-C(63) | 0.1(7)    | C(74)-C(73)-C(76)-F(71) | 102.6(5)  |
| C(64)-C(63)-C(62)-C(61) | -1.2(7)   | C(72)-C(73)-C(76)-F(70) | 165.0(4)  |
| C(66)-C(63)-C(62)-C(61) | -179.1(4) | C(74)-C(73)-C(76)-F(70) | -15.9(6)  |
| C(62)-C(63)-C(64)-C(65) | 1.7(7)    | S(16)-S(15)-N(15)-C(8)  | 1.7(3)    |
| C(66)-C(63)-C(64)-C(65) | 179.5(4)  | S(15)-S(16)-N(16)-C(8)  | 1.5(3)    |
| C(64)-C(63)-C(66)-F(61) | 6.5(7)    | S(15)-N(15)-C(8)-N(16)  | -1.0(6)   |
| C(62)-C(63)-C(66)-F(61) | -175.6(4) | S(15)-N(15)-C(8)-C(80)  | 179.2(3)  |
| C(64)-C(63)-C(66)-F(60) | 127.3(5)  | S(16)-N(16)-C(8)-N(15)  | -0.7(6)   |
| C(62)-C(63)-C(66)-F(60) | -54.8(6)  | S(16)-N(16)-C(8)-C(80)  | 179.1(3)  |
| C(64)-C(63)-C(66)-F(62) | -115.2(5) | N(15)-C(8)-C(80)-C(81)  | 20.1(6)   |
| C(62)-C(63)-C(66)-F(62) | 62.6(6)   | N(16)-C(8)-C(80)-C(81)  | -159.7(4) |
| C(63)-C(64)-C(65)-C(60) | -1.2(7)   | N(15)-C(8)-C(80)-C(85)  | -161.7(4) |
| C(61)-C(60)-C(65)-C(64) | 0.1(7)    | N(16)-C(8)-C(80)-C(85)  | 18.5(6)   |
| C(6)-C(60)-C(65)-C(64)  | -178.4(4) | C(85)-C(80)-C(81)-C(82) | -0.9(6)   |
| S(14)-S(13)-N(13)-C(7)  | -1.3(3)   | C(8)-C(80)-C(81)-C(82)  | 177.3(4)  |
| S(13)-S(14)-N(14)-C(7)  | -1.2(3)   | C(82)-C(83)-C(84)-C(85) | -0.1(7)   |
| S(14)-N(14)-C(7)-N(13)  | 0.6(6)    | C(86)-C(83)-C(84)-C(85) | 177.0(4)  |
| S(14)-N(14)-C(7)-C(70)  | 178.5(3)  | C(83)-C(84)-C(85)-C(80) | -1.0(7)   |
| S(13)-N(13)-C(7)-N(14)  | 0.7(6)    | C(81)-C(80)-C(85)-C(84) | 1.5(6)    |
| S(13)-N(13)-C(7)-C(70)  | -177.3(3) | C(8)-C(80)-C(85)-C(84)  | -176.8(4) |
| N(14)-C(7)-C(70)-C(71)  | -160.8(4) | C(84)-C(83)-C(86)-F(82) | 156.9(4)  |
| N(13)-C(7)-C(70)-C(71)  | 17.2(6)   | C(82)-C(83)-C(86)-F(82) | -26.0(6)  |
| N(14)-C(7)-C(70)-C(75)  | 18.9(6)   | C(84)-C(83)-C(86)-F(80) | -82.2(5)  |
| N(13)-C(7)-C(70)-C(75)  | -163.1(4) | C(82)-C(83)-C(86)-F(80) | 94.9(5)   |
| C(75)-C(70)-C(71)-C(72) | -1.0(7)   | C(84)-C(83)-C(86)-F(81) | 35.0(6)   |

|                         |           |                         |           |
|-------------------------|-----------|-------------------------|-----------|
| C(82)-C(83)-C(86)-F(81) | -147.9(4) | C(84)-C(83)-C(82)-C(81) | 0.7(7)    |
| C(80)-C(81)-C(82)-C(83) | -0.2(6)   | C(86)-C(83)-C(82)-C(81) | -176.3(4) |

**Table S5G.** Least-squares planes (x,y,z in crystal coordinates) and deviations from them in **1**

8.3112 (0.0058) x + 4.6772 (0.0221) y + 0.0375 (0.0292) z = 3.6256 (0.0300)

- \* 0.0008 (0.0027) C8
- \* -0.0113 (0.0023) N15
- \* 0.0102 (0.0023) N16
- \* 0.0122 (0.0014) S15
- \* -0.0120 (0.0015) S16

Rms deviation of fitted atoms = 0.0102

8.2937 (0.0060) x + 5.1137 (0.0225) y - 2.7637 (0.0287) z = 6.5003  
(0.0280) Angle to previous plane (with approximate esd) = 7.348 ( 0.157 )

- \* -0.0002 (0.0027) C7
- \* 0.0085 (0.0023) N13
- \* -0.0082 (0.0023) N14
- \* -0.0095 (0.0015) S13
- \* 0.0094 (0.0015) S14

Rms deviation of fitted atoms = 0.0080

7.8677 (0.0071) x + 6.5943 (0.0225) y - 3.1754 (0.0280) z = 11.2893 (0.0076)  
Angle to previous plane (with approximate esd) = 5.061 ( 0.174 )

- \* 0.0018 (0.0027) C6
- \* 0.0014 (0.0023) N11
- \* -0.0039 (0.0022) N12
- \* -0.0026 (0.0015) S11
- \* 0.0034 (0.0015) S12

Rms deviation of fitted atoms = 0.0028

7.3324 (0.0080) x + 8.1602 (0.0215) y - 3.2936 (0.0278) z = 8.5612  
(0.0066) Angle to previous plane (with approximate esd) = 5.422 ( 0.192 )

- \* -0.0078 (0.0027) C5
- \* -0.0001 (0.0023) N9
- \* 0.0110 (0.0022) N10
- \* 0.0047 (0.0015) S9
- \* -0.0077 (0.0015) S10

Rms deviation of fitted atoms = 0.0073

7.7091 (0.0074) x + 6.7552 (0.0226) y + 0.2073 (0.0282) z = 10.4044  
(0.0188) Angle to previous plane (with approximate esd) = 10.269 ( 0.185 )

- \* -0.0010 (0.0027) C4
- \* 0.0029 (0.0023) N7
- \* -0.0016 (0.0023) N8
- \* -0.0028 (0.0014) S7
- \* 0.0024 (0.0015) S8

Rms deviation of fitted atoms = 0.0023

7.2549 (0.0081) x + 8.2058 (0.0215) y - 0.5861 (0.0280) z = 7.0504  
(0.0253) Angle to previous plane (with approximate esd) = 5.367 ( 0.196 )  
\* 0.0049 (0.0027) C3  
\* -0.0243 (0.0023) N5  
\* 0.0177 (0.0023) N6  
\* 0.0244 (0.0015) S5  
\* -0.0227 (0.0015) S6  
Rms deviation of fitted atoms = 0.0202

8.2070 (0.0061) x + 5.3673 (0.0220) y - 1.6812 (0.0301) z = 1.9215  
(0.0126) Angle to previous plane (with approximate esd) = 10.086 ( 0.176 )  
\* -0.0093 (0.0028) C2  
\* -0.0033 (0.0023) N3  
\* 0.0163 (0.0023) N4  
\* 0.0092 (0.0015) S3  
\* -0.0129 (0.0015) S4  
Rms deviation of fitted atoms = 0.0111

8.2744 (0.0058) x + 4.6863 (0.0220) y + 0.5628 (0.0289) z = 5.8958  
(0.0115) Angle to previous plane (with approximate esd) = 6.150 ( 0.160 )  
\* 0.0054 (0.0026) C1  
\* 0.0085 (0.0022) N1  
\* -0.0161 (0.0022) N2  
\* -0.0127 (0.0015) S1  
\* 0.0149 (0.0015) S2  
Rms deviation of fitted atoms = 0.0122

## Details of the Crystal Structure Refinement of **2**

Both CF<sub>3</sub> groups in the structure of **2** display rotational disorder. This disorder could be described adequately a two-part disorder model but to get reasonable geometries (employing SADI restraints) it was found necessary to include the CF<sub>3</sub> carbon atoms in the model. Because of the relatively high thermal motion in this structure, possibly a consequence of collecting data at only 263(2) K, the newly developed RIGU restraints in ShelXL-2014 have been applied globally to this structure. However, in addition, a strong tendency for the fluorine atoms to go oblate or NPD was solved by applying ISOR restraints. Refined occupancies for both groups came very close to 50%, so the occupancies were frozen at 50:50 in the final cycles of refinement.

The SADI restraints on 1,2 C–F and 1,3 F–F distances permitted the two CF<sub>3</sub> groups to rotate apart without requiring the two rotamers to be staggered. The combination of this approach provided a successful disorder model which is depicted in Figure S10. In the final difference Fourier map, the highest peak of 0.66 e/Å<sup>3</sup> at (0.2723 0.9619 0.4493) and the deepest hole of -0.29 e/Å<sup>3</sup> at (0.3184 0.9178 0.4642) associated with the heaviest atoms in the unit cell, namely antimony, and are *not* associated with the CF<sub>3</sub> groups. This is considered a positive indication of the adequacy of the disorder models applied to the trifluoromethyl groups.

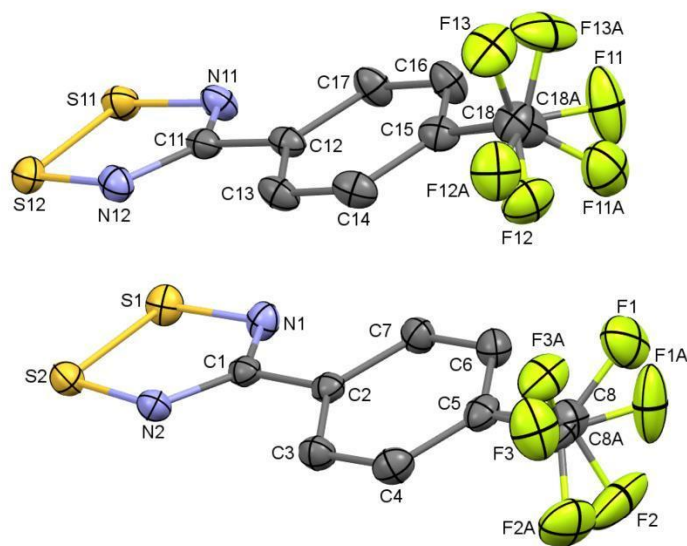

**Figure S10.** Depiction of the two-component disorder models developed for the CF<sub>3</sub> groups of the dimer in **2**. Displacement ellipsoids drawn at 20%. The refined occupancies are 48:52 for C8/C8A and 51:49 for C18/C18A.

**Table S6.** Crystal structure report for **2****Table S6A.** Crystal data and structure refinement for [CF<sub>3</sub>Phdtda]<sub>2</sub>SbPh<sub>3</sub> (**2**) in P-1.

|                                   |                                                                                 |                   |
|-----------------------------------|---------------------------------------------------------------------------------|-------------------|
| Empirical formula                 | C <sub>34</sub> H <sub>23</sub> F <sub>6</sub> N <sub>4</sub> S <sub>4</sub> Sb |                   |
| Formula weight                    | 851.55                                                                          |                   |
| Temperature                       | 263(2) K                                                                        |                   |
| Wavelength                        | 0.71073 Å                                                                       |                   |
| Crystal system                    | Triclinic                                                                       |                   |
| Space group                       | P-1                                                                             |                   |
| Unit cell dimensions              | a = 11.4543(10) Å                                                               | α = 73.3640(10)°. |
|                                   | b = 11.7399(10) Å                                                               | β = 73.2470(10)°. |
|                                   | c = 13.9480(12) Å                                                               | γ = 82.5790(10)°. |
| Volume                            | 1718.6(3) Å <sup>3</sup>                                                        |                   |
| Z                                 | 2                                                                               |                   |
| Density (calculated)              | 1.646 Mg/m <sup>3</sup>                                                         |                   |
| Absorption coefficient            | 1.110 mm <sup>-1</sup>                                                          |                   |
| F(000)                            | 848                                                                             |                   |
| Crystal size                      | 0.460 x 0.420 x 0.280 mm <sup>3</sup>                                           |                   |
| Theta range for data collection   | 1.813 to 28.578°.                                                               |                   |
| Index ranges                      | -15 ≤ h ≤ 15, -15 ≤ k ≤ 15, -18 ≤ l ≤ 18                                        |                   |
| Reflections collected             | 19773                                                                           |                   |
| Independent reflections           | 8041 [R(int) = 0.0195]                                                          |                   |
| Completeness to theta = 25.250°   | 99.6 %                                                                          |                   |
| Refinement method                 | Full-matrix least-squares on F <sup>2</sup>                                     |                   |
| Data / restraints / parameters    | 8041 / 594 / 516                                                                |                   |
| Goodness-of-fit on F <sup>2</sup> | 1.054                                                                           |                   |
| Final R indices [I > 2σ(I)]       | R1 = 0.0313, wR2 = 0.0789                                                       |                   |
| R indices (all data)              | R1 = 0.0404, wR2 = 0.0864                                                       |                   |
| Extinction coefficient            | n/a                                                                             |                   |
| Largest diff. peak and hole       | 0.664 and -0.590 e.Å <sup>-3</sup>                                              |                   |

**Table S6B.** Atomic coordinates ( $\times 10^4$ ) and equivalent isotropic displacement parameters ( $\text{\AA}^2 \times 10^3$ ) for **2**. U(eq) is defined as one third of the trace of the orthogonalized  $U^{ij}$  tensor.

|       | x        | y        | z        | U(eq)  |
|-------|----------|----------|----------|--------|
| S(1)  | 4731(1)  | 3841(1)  | 4461(1)  | 59(1)  |
| S(2)  | 5263(1)  | 2693(1)  | 3496(1)  | 56(1)  |
| N(1)  | 3712(2)  | 4590(2)  | 3885(2)  | 54(1)  |
| N(2)  | 4284(2)  | 3284(2)  | 2822(2)  | 51(1)  |
| C(1)  | 3610(2)  | 4204(2)  | 3101(2)  | 46(1)  |
| C(2)  | 2732(2)  | 4841(2)  | 2507(2)  | 47(1)  |
| C(3)  | 2450(3)  | 4361(2)  | 1803(2)  | 57(1)  |
| C(4)  | 1668(3)  | 4969(3)  | 1221(2)  | 64(1)  |
| C(5)  | 1160(2)  | 6074(3)  | 1329(2)  | 58(1)  |
| C(6)  | 1429(3)  | 6559(3)  | 2022(2)  | 64(1)  |
| C(7)  | 2205(2)  | 5949(2)  | 2613(2)  | 57(1)  |
| C(8)  | 329(12)  | 6808(11) | 698(10)  | 78(3)  |
| F(1)  | 310(7)   | 7942(5)  | 596(7)   | 124(3) |
| F(2)  | -749(6)  | 6417(9)  | 1061(7)  | 157(4) |
| F(3)  | 673(9)   | 6713(8)  | -265(6)  | 117(3) |
| C(8A) | 328(11)  | 6674(10) | 663(9)   | 73(3)  |
| F(1A) | -392(7)  | 7517(9)  | 1000(6)  | 141(3) |
| F(2A) | -357(8)  | 5980(7)  | 489(7)   | 127(2) |
| F(3A) | 939(7)   | 7216(7)  | -279(5)  | 98(2)  |
| S(11) | 6673(1)  | 5563(1)  | 3050(1)  | 62(1)  |
| S(12) | 7171(1)  | 4483(1)  | 2016(1)  | 61(1)  |
| N(11) | 5768(2)  | 6462(2)  | 2431(2)  | 58(1)  |
| N(12) | 6319(2)  | 5253(2)  | 1277(2)  | 57(1)  |
| C(11) | 5709(2)  | 6195(2)  | 1576(2)  | 50(1)  |
| C(12) | 4962(2)  | 7002(2)  | 922(2)   | 49(1)  |
| C(13) | 4760(3)  | 6690(2)  | 96(2)    | 60(1)  |
| C(14) | 4099(3)  | 7449(3)  | -529(2)  | 64(1)  |
| C(15) | 3645(3)  | 8528(3)  | -350(2)  | 60(1)  |
| C(16) | 3834(3)  | 8845(3)  | 472(2)   | 69(1)  |
| C(17) | 4487(3)  | 8083(2)  | 1108(2)  | 63(1)  |
| C(18) | 3050(10) | 9376(11) | -1103(9) | 73(3)  |
| F(11) | 2242(8)  | 10124(7) | -703(5)  | 136(3) |

|        |          |          |           |        |
|--------|----------|----------|-----------|--------|
| F(12)  | 2420(6)  | 8910(9)  | -1547(7)  | 101(2) |
| F(13)  | 3864(6)  | 9984(7)  | -1901(4)  | 114(2) |
| C(18A) | 2942(13) | 9399(12) | -1037(10) | 88(3)  |
| F(11A) | 1805(8)  | 9552(7)  | -580(7)   | 120(2) |
| F(12A) | 2964(7)  | 8987(9)  | -1844(6)  | 105(2) |
| F(13A) | 3414(8)  | 10439(5) | -1414(8)  | 150(3) |
| Sb(1)  | 6584(1)  | 301(1)   | 5808(1)   | 53(1)  |
| C(20)  | 7487(2)  | -974(2)  | 4966(2)   | 46(1)  |
| C(21)  | 8361(2)  | -1831(2) | 5274(2)   | 55(1)  |
| C(22)  | 8864(3)  | -2670(3) | 4723(2)   | 63(1)  |
| C(23)  | 8505(3)  | -2662(3) | 3856(2)   | 62(1)  |
| C(24)  | 7644(3)  | -1827(3) | 3546(2)   | 62(1)  |
| C(25)  | 7137(2)  | -993(2)  | 4093(2)   | 56(1)  |
| C(30)  | 7609(2)  | -147(2)  | 6953(2)   | 47(1)  |
| C(31)  | 8667(2)  | 394(2)   | 6833(2)   | 55(1)  |
| C(32)  | 9284(3)  | 66(3)    | 7598(2)   | 61(1)  |
| C(33)  | 8863(3)  | -817(3)  | 8486(2)   | 65(1)  |
| C(34)  | 7818(3)  | -1372(3) | 8617(2)   | 64(1)  |
| C(35)  | 7188(3)  | -1033(2) | 7862(2)   | 55(1)  |
| C(40)  | 7636(2)  | 1798(2)  | 4804(2)   | 47(1)  |
| C(41)  | 8515(2)  | 1743(2)  | 3888(2)   | 55(1)  |
| C(42)  | 9207(3)  | 2708(2)  | 3299(2)   | 60(1)  |
| C(43)  | 9036(3)  | 3745(2)  | 3619(2)   | 60(1)  |
| C(44)  | 8159(3)  | 3815(2)  | 4524(2)   | 57(1)  |
| C(45)  | 7457(2)  | 2856(2)  | 5100(2)   | 51(1)  |

---

**Table S6C.** Bond lengths [Å] and angles [°] for **2**

|             |            |               |           |
|-------------|------------|---------------|-----------|
| S(1)-N(1)   | 1.629(2)   | C(15)-C(16)   | 1.382(4)  |
| S(1)-S(2)   | 2.0865(9)  | C(15)-C(18)   | 1.483(16) |
| S(2)-N(2)   | 1.629(2)   | C(15)-C(18A)  | 1.510(17) |
| N(1)-C(1)   | 1.336(3)   | C(16)-C(17)   | 1.379(4)  |
| N(2)-C(1)   | 1.330(3)   | C(16)-H(16)   | 0.9300    |
| C(1)-C(2)   | 1.479(3)   | C(17)-H(17)   | 0.9300    |
| C(2)-C(3)   | 1.390(3)   | C(18)-F(11)   | 1.308(10) |
| C(2)-C(7)   | 1.391(4)   | C(18)-F(13)   | 1.318(10) |
| C(3)-C(4)   | 1.376(4)   | C(18)-F(12)   | 1.325(11) |
| C(3)-H(3)   | 0.9300     | C(18A)-F(11A) | 1.289(11) |
| C(4)-C(5)   | 1.381(4)   | C(18A)-F(13A) | 1.303(11) |
| C(4)-H(4)   | 0.9300     | C(18A)-F(12A) | 1.339(11) |
| C(5)-C(6)   | 1.373(4)   | Sb(1)-C(20)   | 2.145(2)  |
| C(5)-C(8A)  | 1.494(15)  | Sb(1)-C(30)   | 2.155(2)  |
| C(5)-C(8)   | 1.504(16)  | Sb(1)-C(40)   | 2.160(3)  |
| C(6)-C(7)   | 1.379(4)   | C(20)-C(21)   | 1.392(3)  |
| C(6)-H(6)   | 0.9300     | C(20)-C(25)   | 1.393(3)  |
| C(7)-H(7)   | 0.9300     | C(21)-C(22)   | 1.386(4)  |
| C(8)-F(2)   | 1.282(11)  | C(21)-H(21)   | 0.9300    |
| C(8)-F(1)   | 1.295(11)  | C(22)-C(23)   | 1.382(4)  |
| C(8)-F(3)   | 1.320(11)  | C(22)-H(22)   | 0.9300    |
| C(8A)-F(1A) | 1.309(11)  | C(23)-C(24)   | 1.369(4)  |
| C(8A)-F(2A) | 1.313(11)  | C(23)-H(23)   | 0.9300    |
| C(8A)-F(3A) | 1.314(10)  | C(24)-C(25)   | 1.380(4)  |
| S(11)-N(11) | 1.626(2)   | C(24)-H(24)   | 0.9300    |
| S(11)-S(12) | 2.0972(10) | C(25)-H(25)   | 0.9300    |
| S(12)-N(12) | 1.629(2)   | C(30)-C(31)   | 1.386(3)  |
| N(11)-C(11) | 1.339(3)   | C(30)-C(35)   | 1.394(3)  |
| N(12)-C(11) | 1.334(3)   | C(31)-C(32)   | 1.385(4)  |
| C(11)-C(12) | 1.485(4)   | C(31)-H(31)   | 0.9300    |
| C(12)-C(17) | 1.380(4)   | C(32)-C(33)   | 1.375(4)  |
| C(12)-C(13) | 1.390(3)   | C(32)-H(32)   | 0.9300    |
| C(13)-C(14) | 1.375(4)   | C(33)-C(34)   | 1.377(5)  |
| C(13)-H(13) | 0.9300     | C(33)-H(33)   | 0.9300    |
| C(14)-C(15) | 1.368(4)   | C(34)-C(35)   | 1.383(4)  |
| C(14)-H(14) | 0.9300     | C(34)-H(34)   | 0.9300    |



|                 |            |                    |            |
|-----------------|------------|--------------------|------------|
| C(35)-H(35)     | 0.9300     | C(6)-C(7)-C(2)     | 120.4(3)   |
| C(40)-C(45)     | 1.391(3)   | C(6)-C(7)-H(7)     | 119.8      |
| C(40)-C(41)     | 1.392(3)   | C(2)-C(7)-H(7)     | 119.8      |
| C(41)-C(42)     | 1.382(4)   | F(2)-C(8)-F(1)     | 111.5(11)  |
| C(41)-H(41)     | 0.9300     | F(2)-C(8)-F(3)     | 104.5(11)  |
| C(42)-C(43)     | 1.385(4)   | F(1)-C(8)-F(3)     | 104.0(10)  |
| C(42)-H(42)     | 0.9300     | F(2)-C(8)-C(5)     | 110.3(9)   |
| C(43)-C(44)     | 1.384(4)   | F(1)-C(8)-C(5)     | 114.3(10)  |
| C(43)-H(43)     | 0.9300     | F(3)-C(8)-C(5)     | 111.7(10)  |
| C(44)-C(45)     | 1.380(4)   | F(1A)-C(8A)-F(2A)  | 107.4(10)  |
| C(44)-H(44)     | 0.9300     | F(1A)-C(8A)-F(3A)  | 104.2(10)  |
| C(45)-H(45)     | 0.9300     | F(2A)-C(8A)-F(3A)  | 102.7(10)  |
|                 |            | F(1A)-C(8A)-C(5)   | 113.3(9)   |
| N(1)-S(1)-S(2)  | 94.40(8)   | F(2A)-C(8A)-C(5)   | 116.4(9)   |
| N(2)-S(2)-S(1)  | 94.42(8)   | F(3A)-C(8A)-C(5)   | 111.7(9)   |
| C(1)-N(1)-S(1)  | 114.27(18) | N(11)-S(11)-S(12)  | 94.56(8)   |
| C(1)-N(2)-S(2)  | 114.39(17) | N(12)-S(12)-S(11)  | 94.12(8)   |
| N(2)-C(1)-N(1)  | 122.5(2)   | C(11)-N(11)-S(11)  | 114.21(19) |
| N(2)-C(1)-C(2)  | 118.7(2)   | C(11)-N(12)-S(12)  | 114.57(19) |
| N(1)-C(1)-C(2)  | 118.7(2)   | N(12)-C(11)-N(11)  | 122.5(2)   |
| C(3)-C(2)-C(7)  | 118.6(2)   | N(12)-C(11)-C(12)  | 119.1(2)   |
| C(3)-C(2)-C(1)  | 120.5(2)   | N(11)-C(11)-C(12)  | 118.4(2)   |
| C(7)-C(2)-C(1)  | 120.9(2)   | C(17)-C(12)-C(13)  | 119.1(3)   |
| C(4)-C(3)-C(2)  | 120.8(3)   | C(17)-C(12)-C(11)  | 120.6(2)   |
| C(4)-C(3)-H(3)  | 119.6      | C(13)-C(12)-C(11)  | 120.3(2)   |
| C(2)-C(3)-H(3)  | 119.6      | C(14)-C(13)-C(12)  | 120.5(2)   |
| C(3)-C(4)-C(5)  | 119.9(3)   | C(14)-C(13)-H(13)  | 119.7      |
| C(3)-C(4)-H(4)  | 120.1      | C(12)-C(13)-H(13)  | 119.7      |
| C(5)-C(4)-H(4)  | 120.1      | C(15)-C(14)-C(13)  | 120.1(3)   |
| C(6)-C(5)-C(4)  | 120.0(3)   | C(15)-C(14)-H(14)  | 119.9      |
| C(6)-C(5)-C(8A) | 123.7(5)   | C(13)-C(14)-H(14)  | 119.9      |
| C(4)-C(5)-C(8A) | 116.3(5)   | C(14)-C(15)-C(16)  | 119.9(3)   |
| C(6)-C(5)-C(8)  | 117.0(5)   | C(14)-C(15)-C(18)  | 118.7(5)   |
| C(4)-C(5)-C(8)  | 123.0(5)   | C(16)-C(15)-C(18)  | 121.2(5)   |
| C(5)-C(6)-C(7)  | 120.3(3)   | C(14)-C(15)-C(18A) | 121.7(5)   |
| C(5)-C(6)-H(6)  | 119.8      | C(16)-C(15)-C(18A) | 118.4(5)   |
| C(7)-C(6)-H(6)  | 119.8      | C(17)-C(16)-C(15)  | 120.3(3)   |

|                      |            |                   |            |
|----------------------|------------|-------------------|------------|
| C(17)-C(16)-H(16)    | 119.9      | C(20)-C(25)-H(25) | 119.4      |
| C(15)-C(16)-H(16)    | 119.9      | C(31)-C(30)-C(35) | 118.2(2)   |
| C(16)-C(17)-C(12)    | 120.1(3)   | C(31)-C(30)-Sb(1) | 123.56(19) |
| C(16)-C(17)-H(17)    | 120.0      | C(35)-C(30)-Sb(1) | 118.21(18) |
| C(12)-C(17)-H(17)    | 120.0      | C(32)-C(31)-C(30) | 120.8(3)   |
| F(11)-C(18)-F(13)    | 108.8(10)  | C(32)-C(31)-H(31) | 119.6      |
| F(11)-C(18)-F(12)    | 102.3(11)  | C(30)-C(31)-H(31) | 119.6      |
| F(13)-C(18)-F(12)    | 103.0(9)   | C(33)-C(32)-C(31) | 120.3(3)   |
| F(11)-C(18)-C(15)    | 113.9(9)   | C(33)-C(32)-H(32) | 119.9      |
| F(13)-C(18)-C(15)    | 111.2(9)   | C(31)-C(32)-H(32) | 119.9      |
| F(12)-C(18)-C(15)    | 116.6(10)  | C(32)-C(33)-C(34) | 119.8(3)   |
| F(11A)-C(18A)-F(13A) | 108.1(11)  | C(32)-C(33)-H(33) | 120.1      |
| F(11A)-C(18A)-F(12A) | 105.9(11)  | C(34)-C(33)-H(33) | 120.1      |
| F(13A)-C(18A)-F(12A) | 107.1(11)  | C(33)-C(34)-C(35) | 120.1(3)   |
| F(11A)-C(18A)-C(15)  | 113.6(10)  | C(33)-C(34)-H(34) | 120.0      |
| F(13A)-C(18A)-C(15)  | 112.3(10)  | C(35)-C(34)-H(34) | 120.0      |
| F(12A)-C(18A)-C(15)  | 109.5(10)  | C(34)-C(35)-C(30) | 120.8(3)   |
| C(20)-Sb(1)-C(30)    | 97.46(9)   | C(34)-C(35)-H(35) | 119.6      |
| C(20)-Sb(1)-C(40)    | 96.88(9)   | C(30)-C(35)-H(35) | 119.6      |
| C(30)-Sb(1)-C(40)    | 95.76(9)   | C(45)-C(40)-C(41) | 118.3(2)   |
| C(21)-C(20)-C(25)    | 117.8(2)   | C(45)-C(40)-Sb(1) | 118.64(18) |
| C(21)-C(20)-Sb(1)    | 123.60(18) | C(41)-C(40)-Sb(1) | 123.04(18) |
| C(25)-C(20)-Sb(1)    | 118.48(18) | C(42)-C(41)-C(40) | 120.8(2)   |
| C(22)-C(21)-C(20)    | 120.7(2)   | C(42)-C(41)-H(41) | 119.6      |
| C(22)-C(21)-H(21)    | 119.6      | C(40)-C(41)-H(41) | 119.6      |
| C(20)-C(21)-H(21)    | 119.6      | C(41)-C(42)-C(43) | 120.1(2)   |
| C(23)-C(22)-C(21)    | 120.2(3)   | C(41)-C(42)-H(42) | 119.9      |
| C(23)-C(22)-H(22)    | 119.9      | C(43)-C(42)-H(42) | 119.9      |
| C(21)-C(22)-H(22)    | 119.9      | C(44)-C(43)-C(42) | 119.7(3)   |
| C(24)-C(23)-C(22)    | 119.8(3)   | C(44)-C(43)-H(43) | 120.2      |
| C(24)-C(23)-H(23)    | 120.1      | C(42)-C(43)-H(43) | 120.2      |
| C(22)-C(23)-H(23)    | 120.1      | C(45)-C(44)-C(43) | 120.0(2)   |
| C(23)-C(24)-C(25)    | 120.3(3)   | C(45)-C(44)-H(44) | 120.0      |
| C(23)-C(24)-H(24)    | 119.8      | C(43)-C(44)-H(44) | 120.0      |
| C(25)-C(24)-H(24)    | 119.8      | C(44)-C(45)-C(40) | 121.1(2)   |
| C(24)-C(25)-C(20)    | 121.2(2)   | C(44)-C(45)-H(45) | 119.4      |
| C(24)-C(25)-H(25)    | 119.4      | C(40)-C(45)-H(45) | 119.4      |

**Table S6D.** Anisotropic displacement parameters ( $\text{\AA}^2 \times 10^3$ ) for **2**. The anisotropic displacement factor exponent takes the form:  $-2\pi^2 [h^2 a^{*2} U^{11} + \dots + 2 h k a^* b^* U^{12}]$

|       | U <sup>11</sup> | U <sup>22</sup> | U <sup>33</sup> | U <sup>23</sup> | U <sup>13</sup> | U <sup>12</sup> |
|-------|-----------------|-----------------|-----------------|-----------------|-----------------|-----------------|
| S(1)  | 63(1)           | 71(1)           | 45(1)           | -19(1)          | -14(1)          | 1(1)            |
| S(2)  | 62(1)           | 46(1)           | 62(1)           | -15(1)          | -17(1)          | 0(1)            |
| N(1)  | 51(1)           | 66(1)           | 49(1)           | -26(1)          | -10(1)          | 3(1)            |
| N(2)  | 53(1)           | 48(1)           | 57(1)           | -20(1)          | -15(1)          | -3(1)           |
| C(1)  | 43(1)           | 48(1)           | 46(1)           | -16(1)          | -3(1)           | -8(1)           |
| C(2)  | 42(1)           | 50(1)           | 46(1)           | -14(1)          | -4(1)           | -9(1)           |
| C(3)  | 63(2)           | 54(1)           | 60(2)           | -22(1)          | -18(1)          | -4(1)           |
| C(4)  | 67(2)           | 75(2)           | 58(2)           | -22(1)          | -22(1)          | -9(1)           |
| C(5)  | 47(1)           | 67(2)           | 53(1)           | -6(1)           | -7(1)           | -8(1)           |
| C(6)  | 59(2)           | 61(2)           | 69(2)           | -20(1)          | -15(1)          | 4(1)            |
| C(7)  | 57(2)           | 60(2)           | 62(2)           | -28(1)          | -15(1)          | 2(1)            |
| C(8)  | 80(6)           | 78(5)           | 75(6)           | -4(4)           | -33(4)          | -8(4)           |
| F(1)  | 140(6)          | 84(3)           | 163(7)          | -10(3)          | -94(5)          | 17(3)           |
| F(2)  | 65(3)           | 212(9)          | 148(7)          | 59(6)           | -48(3)          | -42(4)          |
| F(3)  | 154(8)          | 128(7)          | 85(4)           | -37(4)          | -64(4)          | 33(5)           |
| C(8A) | 51(4)           | 91(5)           | 63(5)           | -1(3)           | -10(3)          | -10(3)          |
| F(1A) | 128(6)          | 196(7)          | 123(6)          | -84(6)          | -78(5)          | 102(5)          |
| F(2A) | 112(5)          | 142(5)          | 147(6)          | -13(5)          | -82(5)          | -25(4)          |
| F(3A) | 86(3)           | 117(6)          | 73(3)           | 17(3)           | -28(2)          | -19(4)          |
| S(11) | 67(1)           | 55(1)           | 74(1)           | -23(1)          | -30(1)          | -5(1)           |
| S(12) | 52(1)           | 59(1)           | 69(1)           | -21(1)          | -6(1)           | 0(1)            |
| N(11) | 75(2)           | 47(1)           | 62(1)           | -22(1)          | -25(1)          | -2(1)           |
| N(12) | 61(1)           | 53(1)           | 54(1)           | -20(1)          | -5(1)           | -1(1)           |
| C(11) | 55(1)           | 44(1)           | 50(1)           | -15(1)          | -6(1)           | -11(1)          |
| C(12) | 59(1)           | 43(1)           | 42(1)           | -12(1)          | -4(1)           | -12(1)          |
| C(13) | 86(2)           | 46(1)           | 49(1)           | -19(1)          | -11(1)          | -9(1)           |
| C(14) | 89(2)           | 63(2)           | 45(1)           | -17(1)          | -14(1)          | -15(1)          |
| C(15) | 69(2)           | 59(2)           | 47(1)           | -8(1)           | -11(1)          | -12(1)          |
| C(16) | 93(2)           | 54(2)           | 66(2)           | -25(1)          | -27(2)          | 9(1)            |
| C(17) | 88(2)           | 55(2)           | 57(2)           | -27(1)          | -26(1)          | 4(1)            |
| C(18) | 74(4)           | 82(5)           | 57(4)           | -10(3)          | -14(3)          | -7(4)           |
| F(11) | 183(7)          | 147(7)          | 88(4)           | -56(5)          | -75(5)          | 98(6)           |

|        |        |        |        |        |         |        |
|--------|--------|--------|--------|--------|---------|--------|
| F(12)  | 90(4)  | 126(4) | 97(5)  | -16(4) | -46(4)  | -17(4) |
| F(13)  | 112(4) | 126(5) | 71(3)  | 29(3)  | -25(3)  | -18(4) |
| C(18A) | 120(6) | 73(5)  | 78(6)  | -6(4)  | -50(5)  | -9(4)  |
| F(11A) | 128(4) | 114(5) | 135(5) | -33(4) | -69(4)  | 19(4)  |
| F(12A) | 126(6) | 133(5) | 65(3)  | -28(4) | -45(4)  | 17(5)  |
| F(13A) | 189(8) | 71(3)  | 203(9) | 49(4)  | -137(6) | -50(4) |
| Sb(1)  | 39(1)  | 61(1)  | 57(1)  | -15(1) | -13(1)  | 0(1)   |
| C(20)  | 43(1)  | 46(1)  | 50(1)  | -8(1)  | -13(1)  | -10(1) |
| C(21)  | 53(1)  | 62(2)  | 58(1)  | -15(1) | -27(1)  | 2(1)   |
| C(22)  | 61(2)  | 59(2)  | 73(2)  | -19(1) | -26(1)  | 6(1)   |
| C(23)  | 69(2)  | 55(2)  | 66(2)  | -21(1) | -12(1)  | -12(1) |
| C(24)  | 73(2)  | 63(2)  | 58(2)  | -16(1) | -26(1)  | -14(1) |
| C(25)  | 59(2)  | 55(1)  | 60(2)  | -9(1)  | -31(1)  | -4(1)  |
| C(30)  | 47(1)  | 45(1)  | 49(1)  | -15(1) | -10(1)  | 1(1)   |
| C(31)  | 49(1)  | 56(1)  | 58(1)  | -9(1)  | -14(1)  | -5(1)  |
| C(32)  | 56(2)  | 62(2)  | 75(2)  | -27(1) | -26(1)  | 4(1)   |
| C(33)  | 81(2)  | 64(2)  | 60(2)  | -26(1) | -33(1)  | 18(1)  |
| C(34)  | 89(2)  | 52(2)  | 47(1)  | -10(1) | -18(1)  | 1(1)   |
| C(35)  | 63(2)  | 49(1)  | 52(1)  | -16(1) | -10(1)  | -8(1)  |
| C(40)  | 46(1)  | 47(1)  | 47(1)  | -12(1) | -15(1)  | 9(1)   |
| C(41)  | 56(1)  | 49(1)  | 58(1)  | -19(1) | -10(1)  | 6(1)   |
| C(42)  | 61(2)  | 56(2)  | 54(1)  | -14(1) | -4(1)   | 5(1)   |
| C(43)  | 65(2)  | 48(1)  | 59(2)  | -7(1)  | -14(1)  | 2(1)   |
| C(44)  | 68(2)  | 45(1)  | 57(1)  | -15(1) | -20(1)  | 8(1)   |
| C(45)  | 52(1)  | 54(1)  | 46(1)  | -15(1) | -16(1)  | 12(1)  |

---

**Table S6E.** Hydrogen coordinates ( $\times 10^4$ ) and isotropic displacement parameters ( $\text{\AA}^2 \times 10^3$ ) for **2**.

|       | x    | y     | z     | U(eq) |
|-------|------|-------|-------|-------|
| H(3)  | 2794 | 3620  | 1725  | 68    |
| H(4)  | 1481 | 4638  | 756   | 77    |
| H(6)  | 1085 | 7302  | 2094  | 76    |
| H(7)  | 2377 | 6282  | 3084  | 69    |
| H(13) | 5075 | 5962  | -34   | 72    |
| H(14) | 3960 | 7229  | -1075 | 77    |
| H(16) | 3520 | 9576  | 597   | 83    |
| H(17) | 4607 | 8298  | 1663  | 75    |
| H(21) | 8610 | -1841 | 5855  | 67    |
| H(22) | 9445 | -3240 | 4938  | 76    |
| H(23) | 8847 | -3222 | 3485  | 75    |
| H(24) | 7400 | -1822 | 2964  | 74    |
| H(25) | 6551 | -432  | 3875  | 67    |
| H(31) | 8966 | 985   | 6231  | 66    |
| H(32) | 9987 | 444   | 7511  | 73    |
| H(33) | 9283 | -1039 | 8996  | 78    |
| H(34) | 7537 | -1975 | 9213  | 77    |
| H(35) | 6474 | -1400 | 7962  | 66    |
| H(41) | 8639 | 1048  | 3671  | 66    |
| H(42) | 9787 | 2662  | 2687  | 72    |
| H(43) | 9509 | 4391  | 3228  | 72    |
| H(44) | 8043 | 4508  | 4743  | 68    |
| H(45) | 6853 | 2919  | 5696  | 61    |

**Table S6F.** Torsion angles [°] for **2**.

|                         |             |                           |             |
|-------------------------|-------------|---------------------------|-------------|
| S(2)-S(1)-N(1)-C(1)     | 0.81(19)    | S(11)-S(12)-N(12)-C(11)   | 1.07(19)    |
| S(1)-S(2)-N(2)-C(1)     | 1.58(18)    | S(12)-N(12)-C(11)-N(11)   | -1.9(3)     |
| S(2)-N(2)-C(1)-N(1)     | -1.4(3)     | S(12)-N(12)-C(11)-C(12)   | 176.35(17)  |
| S(2)-N(2)-C(1)-C(2)     | 177.22(16)  | S(11)-N(11)-C(11)-N(12)   | 1.6(3)      |
| S(1)-N(1)-C(1)-N(2)     | 0.2(3)      | S(11)-N(11)-C(11)-C(12)   | -176.61(18) |
| S(1)-N(1)-C(1)-C(2)     | -178.47(17) | N(12)-C(11)-C(12)-C(17)   | -169.1(3)   |
| N(2)-C(1)-C(2)-C(3)     | 11.9(3)     | N(11)-C(11)-C(12)-C(17)   | 9.2(4)      |
| N(1)-C(1)-C(2)-C(3)     | -169.4(2)   | N(12)-C(11)-C(12)-C(13)   | 9.1(4)      |
| N(2)-C(1)-C(2)-C(7)     | -165.8(2)   | N(11)-C(11)-C(12)-C(13)   | -172.6(2)   |
| N(1)-C(1)-C(2)-C(7)     | 12.9(3)     | C(17)-C(12)-C(13)-C(14)   | 0.2(4)      |
| C(7)-C(2)-C(3)-C(4)     | 0.1(4)      | C(11)-C(12)-C(13)-C(14)   | -178.1(2)   |
| C(1)-C(2)-C(3)-C(4)     | -177.6(2)   | C(12)-C(13)-C(14)-C(15)   | 0.7(4)      |
| C(2)-C(3)-C(4)-C(5)     | 0.4(4)      | C(13)-C(14)-C(15)-C(16)   | -1.1(5)     |
| C(3)-C(4)-C(5)-C(6)     | -0.5(4)     | C(13)-C(14)-C(15)-C(18)   | 173.6(5)    |
| C(3)-C(4)-C(5)-C(8A)    | 179.7(5)    | C(13)-C(14)-C(15)-C(18A)  | 178.4(6)    |
| C(3)-C(4)-C(5)-C(8)     | 178.1(6)    | C(14)-C(15)-C(16)-C(17)   | 0.5(5)      |
| C(4)-C(5)-C(6)-C(7)     | 0.1(4)      | C(18)-C(15)-C(16)-C(17)   | -174.1(5)   |
| C(8A)-C(5)-C(6)-C(7)    | 179.9(5)    | C(18A)-C(15)-C(16)-C(17)  | -179.0(6)   |
| C(8)-C(5)-C(6)-C(7)     | -178.6(5)   | C(15)-C(16)-C(17)-C(12)   | 0.5(5)      |
| C(5)-C(6)-C(7)-C(2)     | 0.5(4)      | C(13)-C(12)-C(17)-C(16)   | -0.8(4)     |
| C(3)-C(2)-C(7)-C(6)     | -0.6(4)     | C(11)-C(12)-C(17)-C(16)   | 177.5(3)    |
| C(1)-C(2)-C(7)-C(6)     | 177.2(2)    | C(14)-C(15)-C(18)-F(11)   | 153.9(7)    |
| C(6)-C(5)-C(8)-F(2)     | -102.9(9)   | C(16)-C(15)-C(18)-F(11)   | -31.5(10)   |
| C(4)-C(5)-C(8)-F(2)     | 78.5(10)    | C(14)-C(15)-C(18)-F(13)   | -82.8(8)    |
| C(6)-C(5)-C(8)-F(1)     | 23.6(11)    | C(16)-C(15)-C(18)-F(13)   | 91.9(8)     |
| C(4)-C(5)-C(8)-F(1)     | -155.0(7)   | C(14)-C(15)-C(18)-F(12)   | 34.9(9)     |
| C(6)-C(5)-C(8)-F(3)     | 141.4(7)    | C(16)-C(15)-C(18)-F(12)   | -150.4(6)   |
| C(4)-C(5)-C(8)-F(3)     | -37.3(11)   | C(14)-C(15)-C(18A)-F(11A) | 112.3(8)    |
| C(6)-C(5)-C(8A)-F(1A)   | -18.9(11)   | C(16)-C(15)-C(18A)-F(11A) | -68.2(10)   |
| C(4)-C(5)-C(8A)-F(1A)   | 160.9(7)    | C(14)-C(15)-C(18A)-F(13A) | -124.7(9)   |
| C(6)-C(5)-C(8A)-F(2A)   | -144.1(7)   | C(16)-C(15)-C(18A)-F(13A) | 54.8(11)    |
| C(4)-C(5)-C(8A)-F(2A)   | 35.7(9)     | C(14)-C(15)-C(18A)-F(12A) | -5.8(11)    |
| C(6)-C(5)-C(8A)-F(3A)   | 98.4(8)     | C(16)-C(15)-C(18A)-F(12A) | 173.6(6)    |
| C(4)-C(5)-C(8A)-F(3A)   | -81.8(9)    | C(25)-C(20)-C(21)-C(22)   | 0.2(4)      |
| S(12)-S(11)-N(11)-C(11) | -0.6(2)     | Sb(1)-C(20)-C(21)-C(22)   | 176.6(2)    |

|                         |           |                         |            |
|-------------------------|-----------|-------------------------|------------|
| C(20)-C(21)-C(22)-C(23) | 0.3(4)    | C(33)-C(34)-C(35)-C(30) | 1.3(4)     |
| C(21)-C(22)-C(23)-C(24) | -0.4(4)   | C(31)-C(30)-C(35)-C(34) | -0.8(4)    |
| C(22)-C(23)-C(24)-C(25) | 0.2(4)    | Sb(1)-C(30)-C(35)-C(34) | 178.9(2)   |
| C(23)-C(24)-C(25)-C(20) | 0.2(4)    | C(45)-C(40)-C(41)-C(42) | 1.1(4)     |
| C(21)-C(20)-C(25)-C(24) | -0.4(4)   | Sb(1)-C(40)-C(41)-C(42) | -176.8(2)  |
| Sb(1)-C(20)-C(25)-C(24) | -177.1(2) | C(40)-C(41)-C(42)-C(43) | 0.4(4)     |
| C(35)-C(30)-C(31)-C(32) | -0.3(4)   | C(41)-C(42)-C(43)-C(44) | -0.9(4)    |
| Sb(1)-C(30)-C(31)-C(32) | 180.0(2)  | C(42)-C(43)-C(44)-C(45) | -0.2(4)    |
| C(30)-C(31)-C(32)-C(33) | 0.9(4)    | C(43)-C(44)-C(45)-C(40) | 1.9(4)     |
| C(31)-C(32)-C(33)-C(34) | -0.4(4)   | C(41)-C(40)-C(45)-C(44) | -2.3(4)    |
| C(32)-C(33)-C(34)-C(35) | -0.6(4)   | Sb(1)-C(40)-C(45)-C(44) | 175.69(19) |

---

Symmetry transformations used to generate equivalent atoms:

**Table S6G.** Short intermolecular contacts for **2** [Å and °].

| Atom 1 | Atom 2  | d(D...A) | s.u.     |
|--------|---------|----------|----------|
| S1     | S11     | 3.0440   | (0.0011) |
| S2     | S12     | 3.0913   | (0.0010) |
| S1     | S11_\$1 | 3.6072   | (0.0010) |
| S1     | S1_\$1  | 3.6557   | (0.0015) |
| S11    | S1_\$1  | 3.6072   | (0.0010) |
| S1     | C45     | 3.4580   | (0.0025) |
| S2     | C40     | 3.5842   | (0.0024) |
| S11    | C44     | 3.1678   | (0.0027) |
| S11    | C43     | 3.3601   | (0.0028) |
| S12    | C43     | 3.3883   | (0.0030) |
| S12    | C42     | 3.4632   | (0.0029) |
| H41    | C32_\$2 | 2.9313   |          |
| H22    | C43_\$2 | 2.9146   |          |
| H22    | C44_\$2 | 2.995    |          |

---

**Table S6H.** Least Squares Planes for **2**

Least-squares planes (x,y,z in crystal coordinates) and deviations from them (\* indicates atom used to define plane)  $6.9407 (0.0068) x + 6.4892 (0.0075) y - 4.0782 (0.0099) z = 3.9650 (0.0072)$

\* 0.0039 (0.0015) C1

\* 0.0053 (0.0013) N1

\* -0.0108 (0.0013) N2

\* -0.0082 (0.0009) S1

\* 0.0098 (0.0008) S2

Rms deviation of fitted atoms = 0.0080

$8.0998 (0.0065) x + 6.2630 (0.0080) y - 2.6676 (0.0108) z = 8.0750 (0.0072)$

Angle to previous plane (with approximate esd) = 7.868 ( 0.131 )

\* 0.0087 (0.0016) C11

\* -0.0045 (0.0014) N11

\* -0.0076 (0.0013) N12

\* 0.0000 (0.0009) S11

\* 0.0034 (0.0009) S12

Rms deviation of fitted atoms = 0.0058
